1     **Title: Overexpression screen of chromosome 21 genes reveals modulators of**  
2                   **Sonic hedgehog signaling relevant to Down syndrome.**

3  
4     **Authors:** Anna J. Moyer<sup>1,2</sup>, Fabian-Xosé Fernandez<sup>3,4,5</sup>, Yicong Li<sup>2</sup>, Donna K. Klinedinst<sup>2</sup>,  
5     Liliana D. Florea<sup>1</sup>, Yasuhiro Kazuki<sup>6</sup>, Mitsuo Oshimura<sup>7</sup>, Roger H. Reeves<sup>1,2\*</sup>

6     **Affiliations:**

7     <sup>1</sup>Department of Genetic Medicine, John Hopkins University School of Medicine: Baltimore, MD  
8     21205, USA.

9     <sup>2</sup>Department of Physiology, Johns Hopkins University School of Medicine: Baltimore, MD  
10    21205, USA.

11    <sup>3</sup>Department of Psychology, University of Arizona: Tucson, AZ 85721 USA.

12    <sup>4</sup>Department of Neurology, University of Arizona: Tucson, AZ 85724, USA.

13    <sup>5</sup>BIO5 and McKnight Brain Research Institutes: Tucson, AZ 85721, USA.

14    <sup>6</sup>Division of Genome and Cellular Functions, Department of Molecular and Cellular Biology,  
15    School of Life Science, Faculty of Medicine and Chromosome Engineering Research Center,  
16    Tottori University, 86 Nishi-cho, Yonago, Tottori 683-8503, Japan; [kazuki@tottori-u.ac.jp](mailto:kazuki@tottori-u.ac.jp)

17    <sup>7</sup>Chromosome Engineering Research Center, Tottori University, Yonago, Tottori 683-8503,  
18    Japan; Trans Chromosomics, Inc., 86 Nishi-cho, Yonago, Tottori 683-8503, Japan.

19

20    \*Corresponding author. Email: [rreeves@jhmi.edu](mailto:rreeves@jhmi.edu)

21 **Abstract:**

22 Dysregulation of Sonic hedgehog (SHH) signaling may contribute to multiple Down syndrome-  
23 associated phenotypes, including cerebellar hypoplasia, congenital heart defects, craniofacial and  
24 skeletal dysmorphologies, and Hirschsprung disease. Granule cell precursors isolated from the  
25 developing cerebellum of Ts65Dn mice are less responsive to the mitogenic effects of SHH than  
26 euploid cells, and a single postnatal dose of the SHH pathway agonist SAG rescues cerebellar  
27 morphology and performance on learning and memory tasks in Ts65Dn mice. SAG treatment  
28 also normalizes expression levels of *OLIG2* in neural progenitor cells derived from human  
29 trisomy 21 iPSCs. However, despite evidence that activating SHH signaling can ameliorate some  
30 Down syndrome-associated phenotypes, chromosome 21 does not encode any components of the  
31 canonical SHH pathway. Here, we screened 163 chromosome 21 cDNAs in a series of SHH-  
32 responsive cell lines to identify chromosome 21 genes that modulate SHH signaling. We  
33 confirmed overexpression of trisomic candidate genes using RNA-seq in Ts65Dn and TcMAC21  
34 cerebellum. Our study indicates that some chromosome 21 genes, including *DYRK1A*, upregulate  
35 SHH signaling while others, such as *HMGNI* and *MISI8A*, inhibit SHH signaling.  
36 Overexpression of genes involved in chromatin structure and mitosis, but not genes previously  
37 implicated in ciliogenesis, regulate the SHH pathway. Our data suggest that cerebellar  
38 hypoplasia and other phenotypes related to aberrant SHH signaling arise from the net effect of  
39 trisomy for multiple chromosome 21 genes rather than the overexpression of a single trisomic  
40 gene. Identifying which chromosome 21 genes modulate SHH signaling may suggest new  
41 therapeutic avenues for ameliorating Down syndrome phenotypes.

42 **One Sentence Summary:** Multiple chromosome 21 genes modulate Sonic hedgehog signaling,  
43 which is dysregulated in Down syndrome.

44 **Main Text:**

45 **INTRODUCTION**

46 Down syndrome is a genetically complex condition with trisomy for >200 protein-coding  
47 genes contributing to an increased risk of more than 30 phenotypes (1-3). Although most Down  
48 syndrome-associated phenotypes remain unexplained at the molecular level, dysregulation of the  
49 Sonic hedgehog (SHH) signaling pathway may contribute to multiple Down syndrome  
50 phenotypes, including cerebellar hypoplasia, hippocampal learning and memory deficits,  
51 congenital heart defects, and more (4). Targeting the pleiotropic effects of aberrant SHH  
52 signaling is an attractive therapeutic strategy because a single treatment could theoretically  
53 rescue multiple phenotypes in individuals with Down syndrome. Given that there are currently  
54 no FDA-approved drugs to treat intellectual disability in Down syndrome, understanding the  
55 molecular mechanisms of SHH dysregulation during neurodevelopment is an aim with direct  
56 clinical relevance.

57 Cerebellar hypoplasia is one of a handful of phenotypes that occur in every individual  
58 with trisomy 21 and was the first Down syndrome-associated phenotype linked to abnormal SHH  
59 signaling (5). As measured by MRI, adults with Down syndrome have a disproportionately small  
60 cerebellum, even when adjusted for total brain volume (6). Ts65Dn mice, the most widely  
61 studied mouse model of Down syndrome, show cerebellar hypoplasia and a reduced density of  
62 cerebellar granule cell neurons; this reduced granule cell neuron density correctly predicted a  
63 similar deficit in people with Down syndrome (7).

64 We traced this reduction in granule cell neuron density to a defect in proliferation of  
65 granule cell precursors in early postnatal development (5). During normal development of the  
66 cerebellum, SHH acts as a mitogen for granule cell precursors (8, 9). Trisomic granule cell

67 precursors isolated from postnatal day 6 (P6) Ts65Dn pups proliferate less in response to SHH  
68 than euploid cells, resulting in a small and hypoplastic cerebellum (5). Neural crest cells  
69 isolated from the first pharyngeal arch of Ts65Dn embryos exhibit a parallel deficit in response  
70 to SHH, which acts as a mitogen for cells that will contribute to the mid and lower face (10).  
71 These experiments suggest that trisomic cells possess an intrinsic deficit in response to SHH  
72 signaling that is relevant to both cerebellar hypoplasia and craniofacial dysmorphology. SHH  
73 signaling is also required for normal development of the heart and enteric nervous system,  
74 supporting the hypothesis that abnormal signaling underlies increased risk of congenital heart  
75 defects and Hirschsprung disease in individuals with Down syndrome (4).

76 Consistent with this hypothesis, a single treatment with the SHH pathway agonist SAG  
77 on the day of birth rescues adult cerebellar morphology, performance on the Morris water maze,  
78 and some aspects of hippocampal long-term potentiation in Ts65Dn mice (11). Similarly,  
79 overexpression of a SHH transgene in the forebrain improves learning and memory in Ts65Dn  
80 mice, whereas overexpression of this SHH transgene in cerebellar Purkinje cells increases  
81 cerebellar volume but does not improve performance on learning and memory tasks (12).  
82 Another recent study showed that increasing the concentration of SAG normalizes expression of  
83 *OLIG2*, a chromosome 21 gene critical for oligodendrocyte development, in “brain-like” neural  
84 progenitors derived from human trisomy 21 iPSCs (13). Although these findings suggest that  
85 human trisomy 21 cells and mouse models of Down syndrome share a common defect in SHH  
86 signaling, treating humans with SAG or other SHH agonists may have unintended consequences  
87 on development. SHH signaling is a central developmental pathway involved in diverse  
88 processes from axis formation in early embryos to maintenance of stem cell niches in adults (14).  
89 Activating mutations in the SHH pathway are associated with medulloblastoma and basal cell

90 carcinoma (15-18). SAG treatment also causes dose-dependent changes in cranial shape and size,  
91 which indicates that stimulation of SHH may have unwanted effects on skeletal development  
92 (19).

93           Given these limitations, targeting the trisomic genes responsible for abnormal SHH  
94 signaling may represent a better therapeutic strategy than activating the SHH pathway directly.  
95 Chromosome 21 does not encode known components of the SHH signaling pathway, and  
96 previous attempts to identify chromosome 21 genes involved in SHH signaling have focused on  
97 a small subset of candidate genes. The DYRK1A protein kinase has been identified as a  
98 modulator of SHH signaling, but returning *Dyrk1a* to disomy was not sufficient to rescue  
99 cerebellar volume in Ts65Dn mice (20-22). Overexpression of pericentrin (*PCNT*) was reported  
100 to disrupt ciliogenesis, which is required for canonical SHH signaling, but the mouse ortholog of  
101 *PCNT* is not trisomic in many of the mouse models with cerebellar hypoplasia, indicating that  
102 other trisomic genes are sufficient to cause this phenotype (23). Triplication of *APP* has also  
103 been proposed to inhibit SHH signaling by upregulating *PTCH1* (24).

104           In contrast to these candidate-based approaches, we sought to identify the chromosome  
105 21 genes underlying disruption of SHH signaling using first principles and synthesis of available  
106 datasets. We propose that 1) Causal genes should be trisomic in mouse models with cerebellar  
107 hypoplasia; 2) Variation in causal genes may be linked to SHH phenotypes outside of the context  
108 of Down syndrome; 3) In the absence of genetic interactions, causal genes should inhibit SHH  
109 signaling when overexpressed; and 4) Causal genes should be expressed in the relevant cell types  
110 and misexpressed in trisomic cells. Here, we integrate data about cerebellar phenotypes collected  
111 in mouse models of Down syndrome, Mendelian disorders, a series of in vitro cDNA screens,  
112 and RNA-seq to show that the overexpression of multiple chromosome 21 genes modulates SHH

113 signaling. Our findings prioritize four chromosome 21 genes (*B3GALT5*, *ETS2*, *HMGNI*, and  
114 *MISI8A*) that are trisomic in Ts65Dn mice, expressed in granule cell precursors, and inhibit  
115 proliferation when overexpressed in primary granule cell precursors.

## 116 **RESULTS**

### 117 **Comparison of cerebellar phenotypes in Down syndrome mouse models**

118 If a single trisomic gene is sufficient to cause a specific phenotype, individuals with  
119 trisomy for that gene will display the phenotype. In humans, this principle has been used to  
120 attempt to identify regions associated with intellectual disability, congenital heart anomalies, and  
121 other – mostly incompletely penetrant – aspects of the syndrome in rare individuals with partial  
122 trisomy 21 (25, 26). However, regional brain volume measurements are not available for human  
123 subjects with partial trisomy. We instead compared previously reported cerebellar volume or  
124 midline cross-sectional area measurements among mouse models at dosage imbalance for  
125 different subsets of chromosome 21 genes or their mouse orthologs (**Fig. 1A and table S1**).  
126 Cerebellar volumes ranged from 78% of euploid in Ts1Cje mice to 116% in 152F7 mice.

### 127 **Manual annotation of chromosome 21 genes related to SHH and ciliopathies**

128 Disruption of the SHH pathway causes a range of well-characterized phenotypes,  
129 including holoprosencephaly, cerebellar hypoplasia, heart defects, skeletal abnormalities, and  
130 cancers such as medulloblastoma and basal cell carcinoma. To further understand how  
131 overexpression of chromosome 21 genes could affect SHH signaling, we manually annotated  
132 chromosome 21 genes associated with hedgehog-related phenotypes through a literature search,  
133 the Online Mendelian Inheritance in Man (OMIM) and Mouse Genome Informatics (MGI)  
134 databases, and the ciliary/centrosome database Cildb v3.0 (**table S2**). Of the 44 chromosome 21

135 genes with associated relevant phenotypes in OMIM, four genes (*CFAP298*, *CFAP410*, *PCNT*,  
136 and *RSPHI*) encode proteins involved in ciliogenesis. Mutations in an additional 12 genes  
137 (*CSTB*, *DSCAM*, *JAM2*, *KCNJ6*, *OLIG1*, *OLIG2*, *PRDM15*, *PSMG1*, *SOD1*, *SON*, *TRAPPC10*,  
138 and *WDR4*) are associated with cerebellar phenotypes or holoprosencephaly in humans or in  
139 mouse models. Unsurprisingly, many chromosome 21 genes have been reported to act upstream  
140 or downstream of SHH signaling in various cell types, including *ABCG1*, *ADARBI*, *APP*,  
141 *DYRK1A*, *GABPA*, *OLIG1*, *OLIG2*, *RUNX1*, *SIM2*, *SOD1*, *TIAMI*, and *USP25*. For several  
142 genes, multiple lines of evidence link their encoded proteins with SHH signaling or ciliogenesis.  
143 For example, mutant *Trappc10* mice possess septal defects, holoprosencephaly, anophthalmia,  
144 thymus hypoplasia, and cleft palate. The human *TRAPPC10* gene is located in a previously  
145 identified “holoprosencephaly critical region,” and knockdown of *TRAPPC10* impairs cilia  
146 formation in RPE cells (27, 28). Together, these annotations suggest that proteins encoded by  
147 chromosome 21 genes are components of both motile and primary cilia and may modulate SHH  
148 signaling through non-canonical pathways in diverse tissue types.

#### 149 **Primary screen for chromosome 21 cDNAs that affect SHH signaling**

150 Although several chromosome 21 genes have previously been associated with SHH  
151 signaling, most annotations derive from loss-of-function mutations rather than overexpression.  
152 To identify genes whose overexpression is sufficient to modulate SHH signaling, we designed a  
153 multilevel screen in zebrafish (29) and in four SHH-responsive cell types (**Fig. 2A**). We first  
154 screened a library of 163 human chromosome 21 cDNAs selected for high homology to mouse  
155 genes (**table S3**) in two well-established SHH-responsive cell lines: Shh-LIGHT2 cells, which  
156 express firefly luciferase from the SHH-responsive promoter of Gli1 (Fluc; 8xGliBS-FL) and  
157 renilla luciferase from a constitutive promoter (Rluc; pRL-TK, Promega), and SmoA1-LIGHT

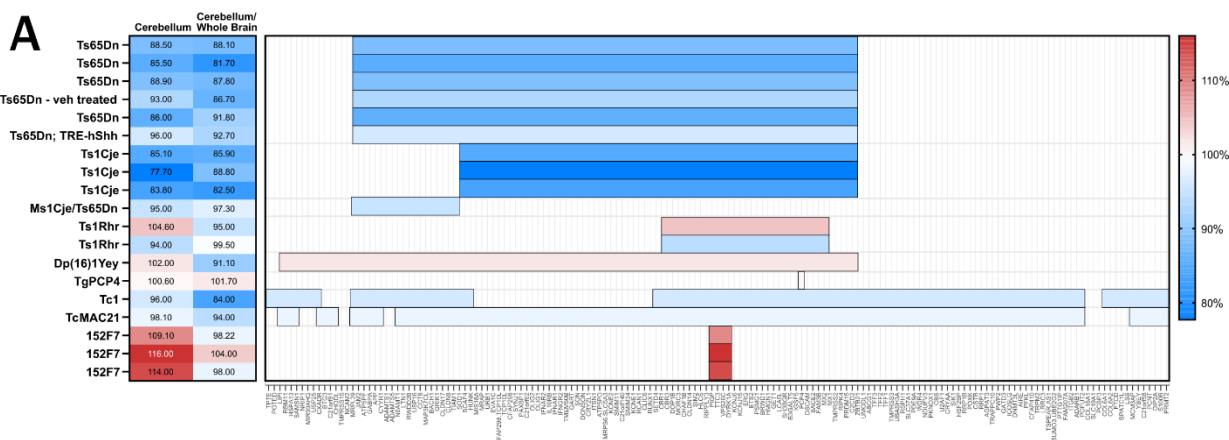

158

159 **Fig. 1. Comparison of cerebellar phenotypes in Down syndrome mouse models. (A)**

160 Previously published cerebellar volume/cross-sectional area and cerebellar volume/cross-

161 sectional area normalized to whole brain are reported as a percent of euploid. Horizontal bars

162 represent the chromosome 21 or mouse orthologous regions that are trisomic in each model.

163 Color reflects the extent of cerebellar hypoplasia, where blue is most affected and red is least

164 affected. Several additional studies quantifying cerebellar hypoplasia are generally consistent

165 with these results but do not report cerebellar volume/cross-sectional area and cerebellar

166 volume/cross-sectional area normalized to whole brain as a percent of euploid (21, 30, 31).

167



168 cells, which are based on Shh-LIGHT2 cells but also possess an oncogenic mutation in Smo  
169 (W539L) that activates SHH signaling in the absence of pharmacological stimulation (15).

170 Shh-LIGHT2 cells responded robustly to the hedgehog agonists fluocinonide,  
171 fluticasone, and SAG, whereas vitamin D3 inhibited SAG-induced reporter activity (**Fig. 2B**).  
172 Transient overexpression of nine genes increased or decreased the ratio of Fluc to Rluc activity  
173 by more than two standard deviations ( $z \leq -2$  or  $z \geq 2$ ) in Shh-LIGHT2 cells treated with SAG  
174 (**table S4**). Overexpression of *ABCG1*, *CRYAA*, *DOP1B*, *DYRK1A*, *ITSN1*, *MCM3AP*, and  
175 *N6AMT1* activated SHH signaling, whereas overexpression of *GET1* and *S100B* inhibited SHH  
176 (**Fig. 2C**).

177 In SmoA1-LIGHT cells, overexpression of *DYRK1A*, *IFNAR2*, and *MRPL39* increased  
178 SHH signaling by more than two standard deviations, and overexpression of *ABCG1*, *KCNE1*,  
179 *NDUFV3*, and *PRMT2* inhibited SHH signaling (**Fig. 3A and table S5**). We also identified an  
180 additional six genes that modulated SHH signaling by more than one standard deviation in both  
181 screens: *CHODL*, *HMGNI*, *KCNJ15*, *TTC3*, *UBASH3A*, and *VPS26C*. Of the twenty total genes  
182 identified in Shh-LIGHT2 or SmoA1-LIGHT screens, sixteen affected SHH signaling in the  
183 same direction in both cell lines: overexpression of *GET1*, *HMGNI*, *KCNE1*, *KCNJ15*,  
184 *NDUFV3*, *PRMT2*, and *UBASH3A* inhibited SHH signaling, overexpression of *CRYAA*,  
185 *DYRK1A*, *IFNAR2*, *ITSN1*, *MCM3AP*, *MRPL39*, *N6AMT1*, *TTC3*, and *VSP26C* upregulated SHH  
186 signaling, and *ABCG1*, *CHODL*, *DOP1B*, and *S100B* showed discordant directions of effect in  
187 the two cell lines (**Fig. 3B**). We previously screened the chromosome 21 cDNA library in  
188 developing zebrafish and identified eleven genes that caused gross morphological defects or  
189 lethality when overexpressed; seven of these genes affected development of structures that are  
190 substantially influenced by or dependent on SHH signaling (29). However, there was no overlap

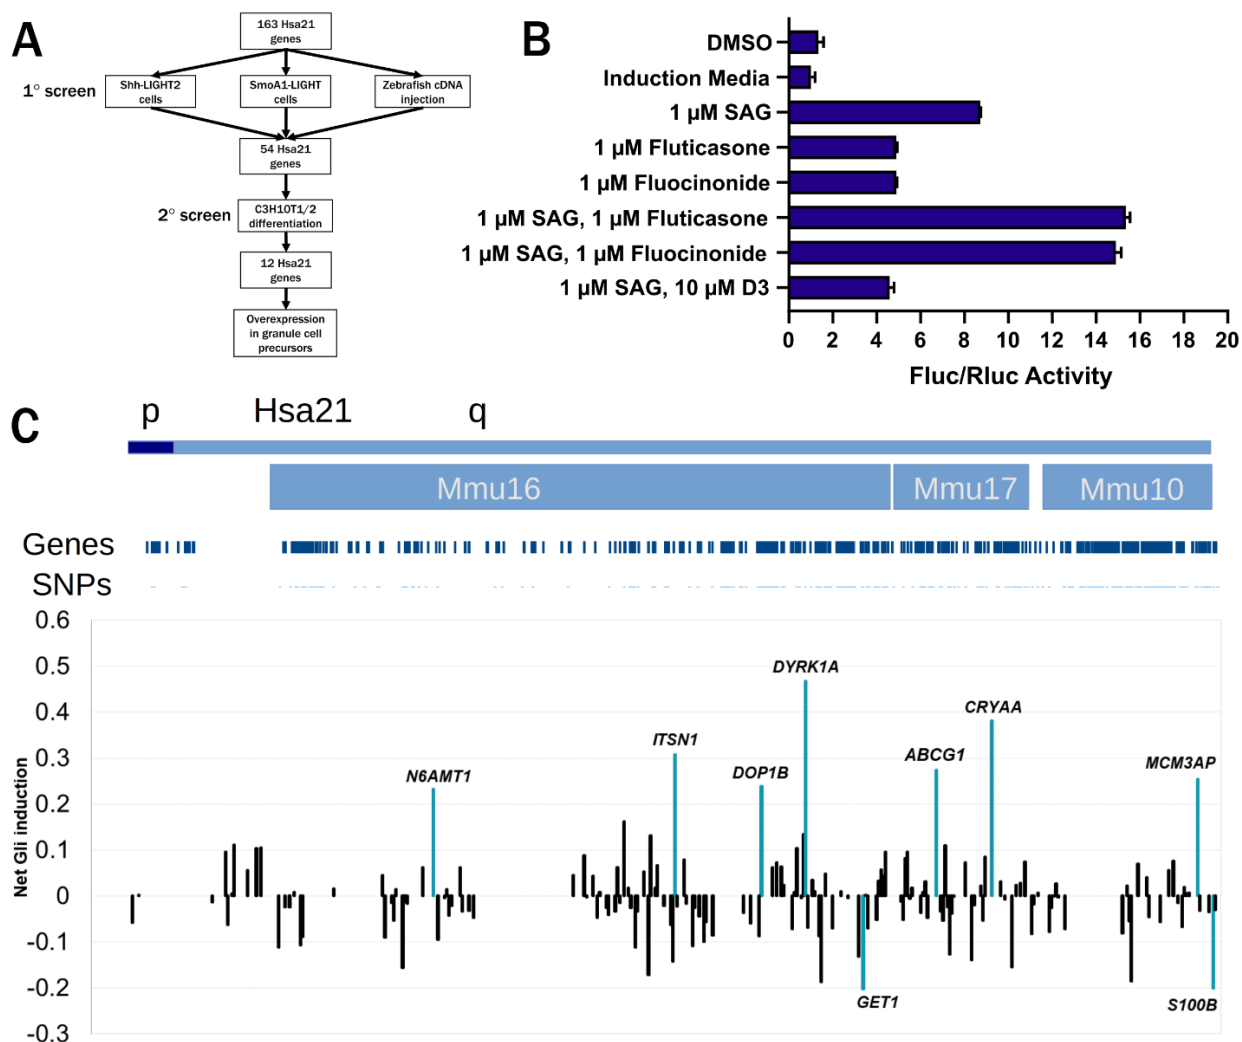

191  
 192 **Fig.2. Overexpression of chromosome 21 cDNAs in Shh-LIGHT2 cells. (A)** Screening  
 193 strategy for chromosome 21 cDNAs in Shh-LIGHT2 and SmoA1-LIGHT cell lines, zebrafish  
 194 embryos, C3H10T1/2 mesenchymal stem cell line, and primary granule cell precursors. **(B)**  
 195 Fluc/Rluc activity in Shh-LIGHT2 cells exposed to SAG, the glucocorticoids fluocinonide and  
 196 fluticasone, and vitamin D3 normalized to induction media control (n=2 independent  
 197 experiments with 12 technical replicates per treatment). All graphs show mean ± SD unless  
 198 otherwise noted. **(C)** Shh-LIGHT2 cells transfected with expression constructs for 163  
 199 chromosome 21 cDNAs and treated with SAG to induce SHH signaling ( $\geq 8$  technical replicates

200 per cDNA; see table S4 for wells per cDNA). Averaged Fluc/Rluc activity for each gene across  
201 the Shh-LIGHT2 screen was scaled to 0 to show signal deflections from baseline. Values less  
202 than zero represent loci that decrease SAG-induced activation of the SHH signaling pathway.  
203 The net activity of the 8xGliBS reporter for each cDNA is plotted in chromosomal order  
204 according to the sequence along the proximal-distal length of chromosome 21. Orthologous  
205 regions on mouse chromosomes 16, 17, and 10 are provided for additional context. Labeled  
206 cDNAs increased or decreased Fluc/Rluc activity by more than two SD.

207

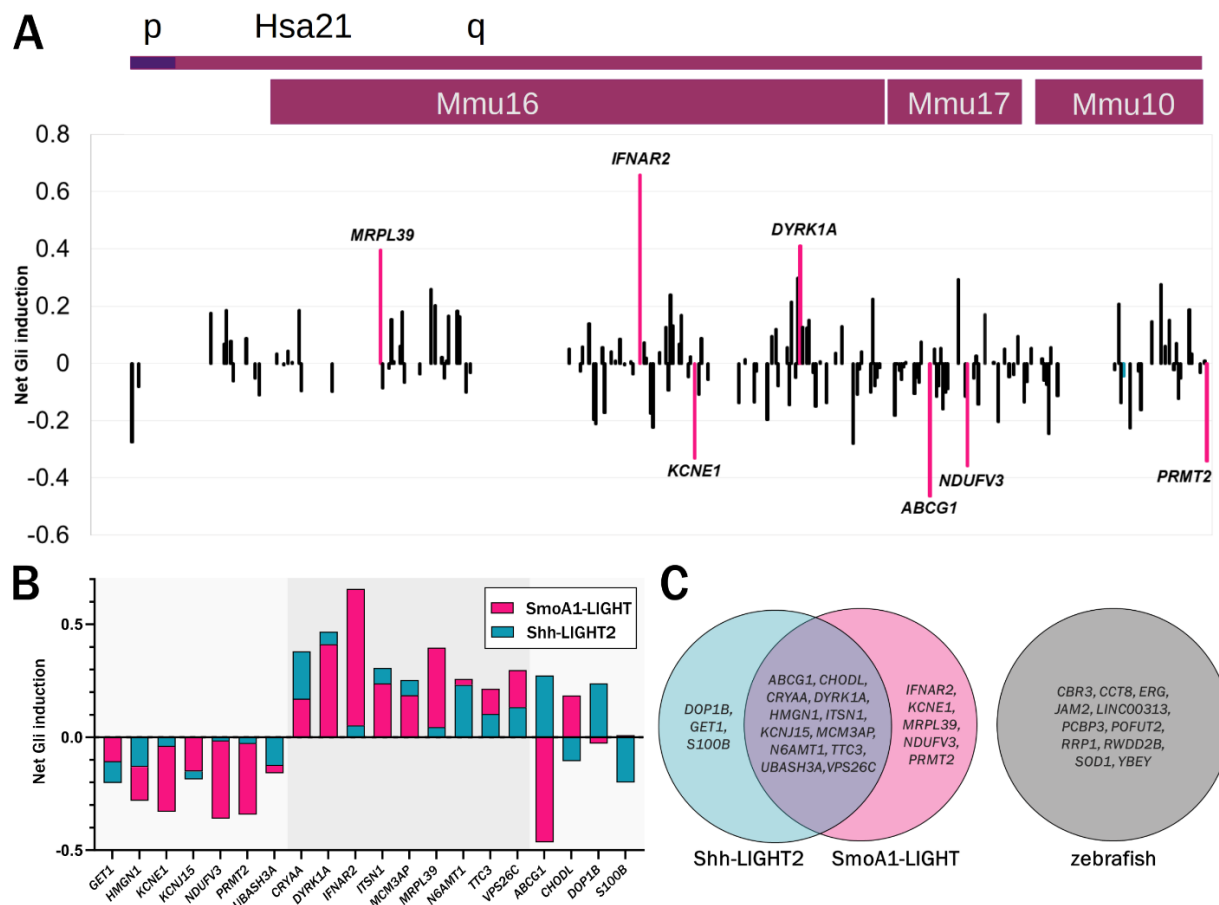

208

209 **Fig.3. Overexpression of chromosome 21 cDNAs in SmoA1-LIGHT cells.** (A) SmoA1-  
 210 LIGHT cells transfected with expression constructs for 163 chromosome 21 cDNAs ( $\geq 8$   
 211 technical replicates per cDNA; see table S5 for wells per cDNA). Averaged Fluc/Rluc activity  
 212 for each gene across the SmoA1-LIGHT screen was scaled to 0 to show signal deflections from  
 213 baseline. Labeled cDNAs increased or decreased Fluc/Rluc activity by more than two SD. (B)  
 214 Comparison of net reporter induction after overexpression of twenty cDNAs identified in SmoA-  
 215 LIGHT and Shh-LIGHT2 screens. Sixteen cDNAs have the same direction of effect in both  
 216 screens, whereas four cDNAs have opposite directions of effect. (C) Comparison of cDNAs  
 217 identified in two luciferase assays and a previous screen in developing zebrafish embryos (29).

218 between any of these eleven genes and the twenty genes prioritized by the luciferase assays (**Fig.**  
219 **3C**).

220 We compared the results of our cDNA overexpression screens to four previously reported  
221 genome-wide siRNA knockdown and CRISPR knockout screens in 3T3-derived cell lines  
222 containing the 8xGliBS reporter (**fig. S1 and table S6**). Neither Shh-LIGHT2 nor SmoA1-  
223 LIGHT screens showed a significant correlation with two siRNA screens in NIH-3T3-ShhFL  
224 cells, which produce SHH endogenously (32). However, our Shh-LIGHT2 screen showed a  
225 weak negative correlation with two CRISPR knockout screens in 3T3 cells treated with ShhN,  
226 suggesting that knockout and overexpression of some chromosome 21 genes may have opposing  
227 effects on SHH signaling (33, 34). Of the 31 candidate genes identified by our cDNA and  
228 zebrafish screens, *DYRK1A*, *GET1*, *MCM3AP*, *PCBP3*, and *POFUT2* were identified in one or  
229 more of the four knockdown/knockout screens.

### 230 **Secondary screen using a functional cell-based assay of osteoblast differentiation**

231 Based on our primary screen, we selected 54 chromosome 21 genes to further  
232 characterize in a functional cell-based assay. The C3H10T1/2 mesenchymal stem cell line  
233 undergoes SHH-dependent differentiation into osteoblasts and has been used to identify agonists  
234 and antagonists of the SHH signaling pathway (35-37). We transfected C3H10T1/2 cells with  
235 candidate cDNAs and quantified alkaline phosphatase activity, an early marker of osteoblast  
236 differentiation. In the absence of SAG treatment, overexpression of *GLII* was sufficient to  
237 induce osteoblast differentiation (**Fig. 4A**). Stimulation of osteoblast differentiation by 200 nM  
238 SAG was inhibited by co-treatment with 2  $\mu$ M cyclopamine and by overexpression of the  
239 heterotrimeric G-protein subunit G $\alpha$ S (*GNAS*), which inhibits SHH signaling via protein kinase  
240 A (PKA) (33, 38). Overexpression of the previously identified regulator of SHH signaling

241 *MOSMO* had no effect on alkaline phosphatase activity, whereas overexpression of *GLII* further  
242 induced osteoblast differentiation even in the presence of SAG (33).

243 In C3H10T1/2 cells treated with SAG, overexpression of six chromosome 21 cDNAs  
244 (*ABCG1*, *HMGNI*, *JAM2*, *MISI8A*, *NDUFV3*, and *RWDD2B*) significantly reduced osteoblast  
245 differentiation compared to control, indicating that overexpression of these cDNAs attenuated  
246 SHH signaling (**Fig. 4B** and **fig. S2**). Overexpression of three chromosome 21 cDNAs  
247 (*CHAF1B*, *GET1*, and *PCBP3*) significantly increased osteoblast differentiation compared to  
248 control. Staining of cells for alkaline phosphatase activity in a subset of cDNAs confirmed  
249 inhibition of osteoblast differentiation and suggested a possible reduction in cell density  
250 following transfection of some cDNAs (**Fig. 4C**). Because reduced viability could affect  
251 osteoblast differentiation independently of SHH signaling, we assessed cell viability at three time  
252 points post-transfection using a MTT assay. Both cDNA ( $f(12, 156)=5.327$ ,  $P<0.0001$ ) and SAG  
253 treatment ( $f(1, 156) = 6.474$ ,  $P=0.0119$ ) had a significant effect on viability, but the interaction  
254 between these terms was not significant (**Fig. 4D** and **fig. S2**). In untreated cells, overexpression  
255 of *KCNE1*, *KCNJ15*, *LRR3*, and *NDUFV3* and treatment with cyclopamine reduced cell  
256 viability compared to control. In cells treated with SAG, only cyclopamine treatment  
257 significantly affected viability.

## 258 **Expression of candidate genes in developing cerebellum**

259 To determine whether candidate genes are expressed in a SHH-responsive tissue relevant  
260 to Down syndrome-associated cerebellar hypoplasia, we performed RNA-seq on P6 cerebellum  
261 collected from Ts65Dn (n=4 trisomic and 4 euploid littermates) and TcMAC21 (n=4 trisomic  
262 and 4 euploid littermates) pups. At this stage of development, the cerebellum is composed  
263 primarily of proliferating granule cell precursors and differentiating granule cells (39, 40). We

264

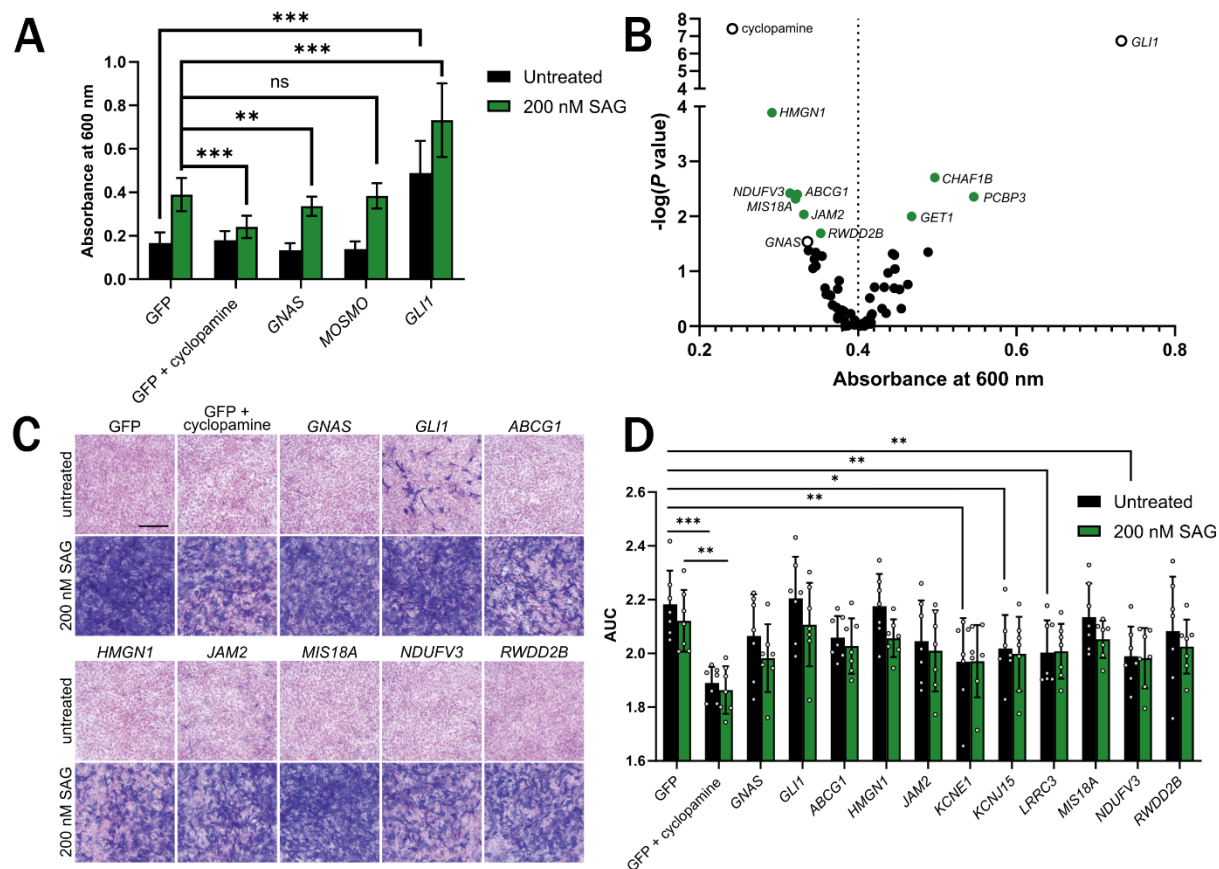

265

266 **Fig.4. Overexpression of chromosome 21 genes affects osteoblast differentiation of**  
 267 **C3H10T1/2 cells. (A)** Overexpression of *GLI1* promotes osteoblast differentiation in the  
 268 presence or absence of SAG, whereas treatment with cyclopamine or overexpression of *GNAS*  
 269 inhibits SAG-induced osteoblast differentiation (n=20). \*\*\*P<0.001, \*\*P<0.01, \*P<0.05 (two-  
 270 tailed unpaired Student's t-test). **(B)** Quantification of alkaline phosphatase activity in  
 271 C3H10T1/2 cells transfected with chromosome 21 cDNAs and treated with SAG (n=20).  
 272 Multiple comparisons were corrected for by controlling the false discovery rate; green circles  
 273 denote cDNAs with q<0.1. Open circles denote controls (Kruskal-Wallis test followed by Dunn's  
 274 post-hoc test). **(C)** Representative alkaline phosphatase staining in C3H10T1/2 cells transfected  
 275 with chromosome 21 cDNAs and counterstained with nuclear fast red (n=3). Scale bar: 100  $\mu$ m.

276 **(D)** MTT viability assay in C3H10T1/2 cells transfected with chromosome 21 cDNAs (n=7). Y-  
277 axis represents area under the curve (AUC) of cell viability 48, 72, and 96 hours after  
278 transfection (two-way ANOVA followed by Fisher's LSD test). Differences reported as  
279 statistically significant have  $q < 0.05$ .

280



281 previously found that granule cell precursors isolated from P6 Ts65Dn pups respond less to the  
282 mitogenic effects of SHH than euploid cells, and by P6, cerebellar cross-sectional area is  
283 significantly reduced in Ts65Dn (5). For TcMAC21 samples, length-normalized counts for  
284 human chromosome 21 transcripts were added to counts for corresponding mouse orthologs and  
285 compared to euploid counts. Trisomic genes were overexpressed by an average of  $1.45 \pm 0.29$  in  
286 Ts65Dn mice and  $1.81 \pm 1.18$  in TcMAC21 mice compared to euploid (**Fig. 5A**). The majority of  
287 trisomic genes with detectable expression in Ts65Dn mice had fold changes between 1.3 and 1.7,  
288 whereas TcMAC21 samples had a higher proportion of trisomic genes with fold changes above  
289 1.7 (**Fig. 5B**). Arranged by chromosomal position, expression patterns were consistent with the  
290 previously reported breakpoint of the Ts65Dn 17<sup>16</sup> chromosome and the four deletions reported  
291 in the TcMAC21 HSA21q-MAC hybrid chromosome (**Fig. 5C**) (41, 42). Expression of human  
292 chromosome 21 genes in TcMAC21 cerebellum was positively correlated with previously  
293 published P1 forebrain expression levels ( $r=0.39$ ,  $P=2.3e-05$ ) (**Fig. 5D**), and 31 human genes  
294 were not detected in TcMAC21 P1 forebrain or P6 cerebellum (**Fig. 5E**).

295 We also identified differential expression of disomic genes in both Ts65Dn and  
296 TcMAC21 models (**Fig. 5F, fig. S3, table S7, and table S8**). Although expression levels in  
297 Ts65Dn and TcMAC21 cerebella were positively correlated ( $r=0.529$  and  $P=2.2e-16$ ), only two  
298 disomic genes, *Lrch4* and *Snhg11*, were significantly differentially expressed in both models  
299 using a false discovery rate of 0.05 (**fig. S3**). Gene ontology and gene set enrichment analyses of  
300 differentially expressed genes in Ts65Dn samples suggested changes in gene expression related  
301 to nervous system development, higher mental function, and cholesterol biosynthesis (**fig. S4**  
302 **and S5 and table S9**). Ts65Dn samples also showed reduced expression of mitotic and cell cycle  
303 pathways and increased expression of genes related to protein translation initiation and

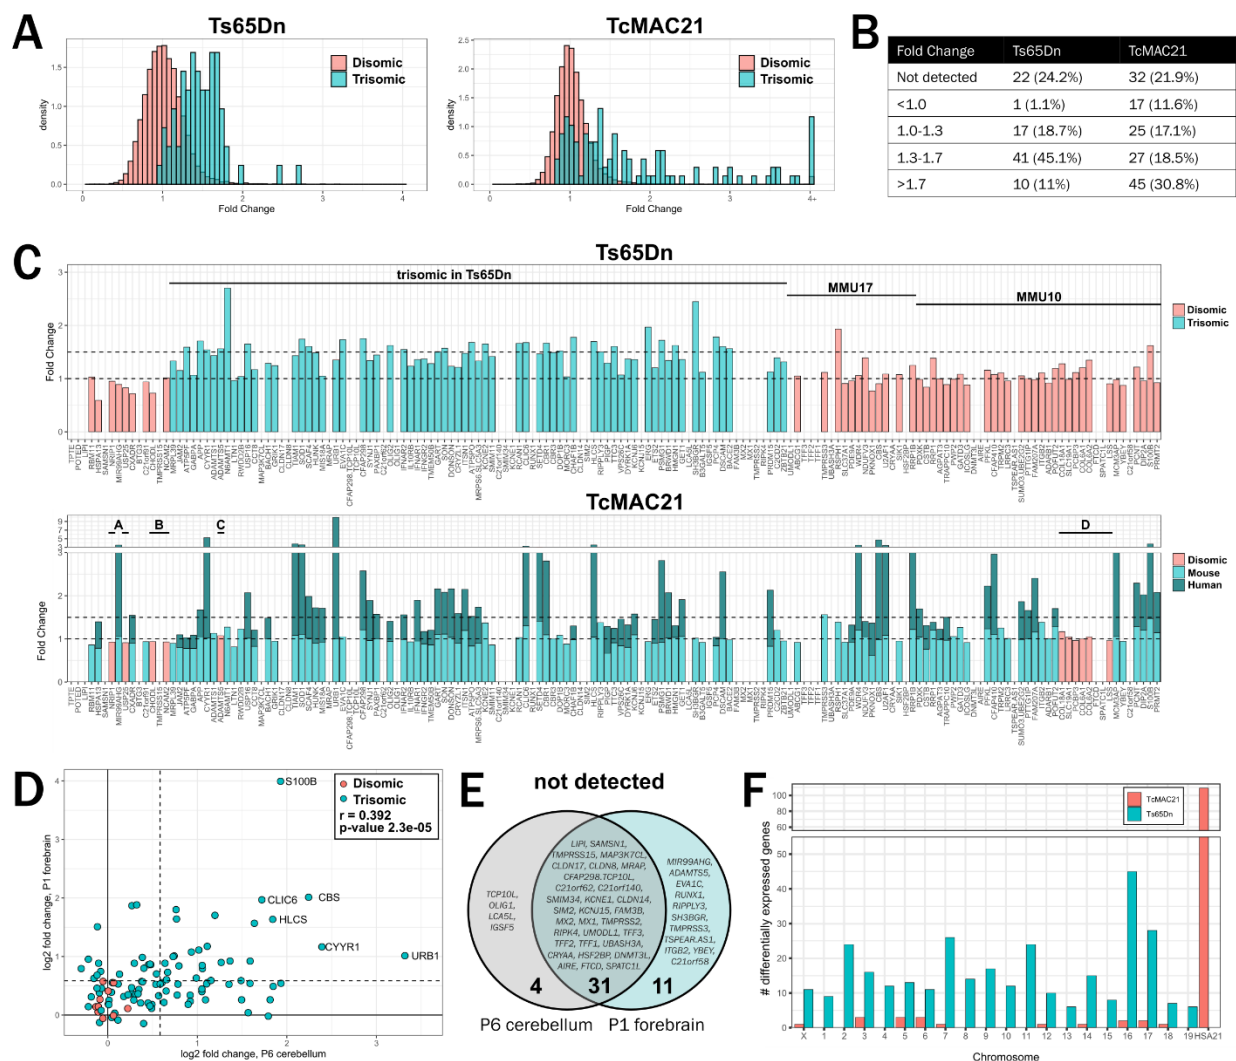

304

305 **Fig.5. Expression pattern of chromosome 21 genes and their mouse orthologs in Ts65Dn**

306 **and TcMAC21 cerebellum. (A)** Density histograms of disomic (salmon) and trisomic (teal) fold

307 changes in Ts65Dn and TcMAC21 cerebellum (n=4 Ts65Dn, 4 Ts65Dn euploid littermates, 4

308 TcMAC21, 4 TcMAC21 euploid littermates). Plot represents 13,807 detectable transcripts. **(B)**

309 Trisomic gene fold changes binned by expression levels. **(C)** Fold changes of chromosome 21

310 genes and their mouse orthologs arranged in chromosomal order from proximal to distal.

311 Chromosome 21 orthologs are located on mouse chromosome 16 (MMU16), MMU17, and

312 MMU10. For TcMAC21, teal represents the proportion of length-normalized reads contributed

313 by mouse copies and dark teal represents reads derived from the human chromosome. Four  
314 previously reported deletions are labeled A through D. Five human genes that were detected in  
315 TcMAC21 but have no expression of mouse orthologs for normalization (*POTED*, *BTG3*,  
316 *RUNX1*, *C21orf58*, and *TSPEAR.ASI*) are excluded. **(D)** Scatterplot of chromosome 21 log<sub>2</sub> fold  
317 changes in TcMAC21 P6 cerebellum and P1 forebrain (42). Pearson correlation coefficient  
318  $r=0.392$  and  $P=2.3e-05$ . **(E)** Chromosome 21 transcripts not detected in P6 cerebellum, P1  
319 forebrain, or both. **(F)** Chromosomal locations of differentially expressed genes in Ts65Dn and  
320 TcMAC21 cerebellum. Trisomic genes are located on MMU16 and MMU17 in Ts65Dn mice  
321 and HSA21 in TcMAC21 mice.  
322

323 elongation (**fig. S5**). The trisomic chromatin modifiers and remodelers *Chaf1b*, *Hmgn1*, *Setd4*,  
324 and *Brwd1* were significantly upregulated, and non-trisomic epigenetic regulators *Rps6ka5*,  
325 *Rere*, *Brd4*, *Kdm7a*, and *Top2a* were dysregulated (**fig. S6**). Elements of the Polycomb  
326 repressive complex (*Mbd6*, *Pcgf2*, and *Auts2*) and SWI/SNF complex (*Arid1a*, *Arid1b*, and  
327 *Bicra*) were also upregulated.

### 328 **Synthesis of expression and SHH screen data to prioritize candidate genes**

329 We next integrated expression data with our primary and secondary SHH screen data.  
330 Leading candidate genes should be expressed in developing cerebellum, trisomic in mouse  
331 models with cerebellar hypoplasia, and consistently inhibit SHH across in vitro screens. Eighteen  
332 genes were not detected in our RNA-seq data, had FPKM (fragments per kilobase of exon per  
333 million mapped) values <1 in 13 human cerebellar samples ranging from 12 post-conception  
334 weeks to 4 months (BrainSpan Atlas of the Developing Human Brain), and had TPM (transcripts  
335 per million) <1 in mouse P2 and P11 granule cell precursor and granule cell populations (**Fig. 6A**  
336 **and table S10**) (39, 43). Although these 18 genes may contribute to dysregulated SHH signaling  
337 in other tissues, such as the heart or craniofacial skeleton, they appear as unlikely candidates for  
338 cerebellar hypoplasia.

339 Synthesis of data from our primary luciferase screens and secondary C3H10T1/2 screen  
340 also revealed candidate genes with the most consistent effects across cell lines (**Fig. 6B**). For  
341 example, overexpression of *HMGNI* consistently inhibited SHH, whereas overexpression of  
342 *DYRK1A* consistently activated SHH. Most cDNAs showed relatively consistent effects across  
343 cell types, but some cDNAs, such as *ABCG1* and *GET1*, showed strong but discordant effects  
344 across screens. We mapped candidate cDNAs to mouse models and identified a subset of six  
345 genes that appear to inhibit SHH across screens and have mouse orthologs located on mouse

346 chromosome 16 (**Fig. 6C**). Putative activators of SHH that are trisomic in Ts65Dn mice  
347 (*DYRK1A*, *IFNAR2*, *ITSN1*, *MRPL39*, *N6AMT1*, *TTC3*, and *VPS26C*) may provide compensatory  
348 effects, while putative inhibitors of SHH with mouse orthologs on chromosomes 10 and 17  
349 (*NDUFV3*, *PRMT2*, and *UBASH3A*) may inhibit SHH via a mechanism independent of  
350 dysregulated SHH signaling in Ts65Dn cells.

351 **Overexpression of four candidate genes inhibits proliferation of primary granule cell**  
352 **precursors**

353 To evaluate top candidate cDNAs in a context relevant to cerebellar hypoplasia, we  
354 cloned 12 chromosome 21 cDNAs into lentiviral vectors, overexpressed them in primary euploid  
355 granule cell precursors, and quantified proliferation via incorporation of EdU. As expected,  
356 overexpression of *SHH* itself significantly increased proliferation, and overexpression of *GNAS*,  
357 which has been identified as a tumor suppressor gene in the SHH subtype of medulloblastoma,  
358 significantly inhibited proliferation (**Fig. 6D**) (44). Of the 12 chromosome 21 cDNAs,  
359 overexpression of four (*B3GALT5*, *ETS2*, *HMGNI*, and *MISI8A*) significantly reduced  
360 proliferation compared to overexpression of DsRed2. These results suggest that at least some of  
361 the candidate cDNAs identified in the luciferase, zebrafish, and C3H10T1/2 screens also  
362 modulate SHH signaling in the developing cells of the cerebellum.

363

364

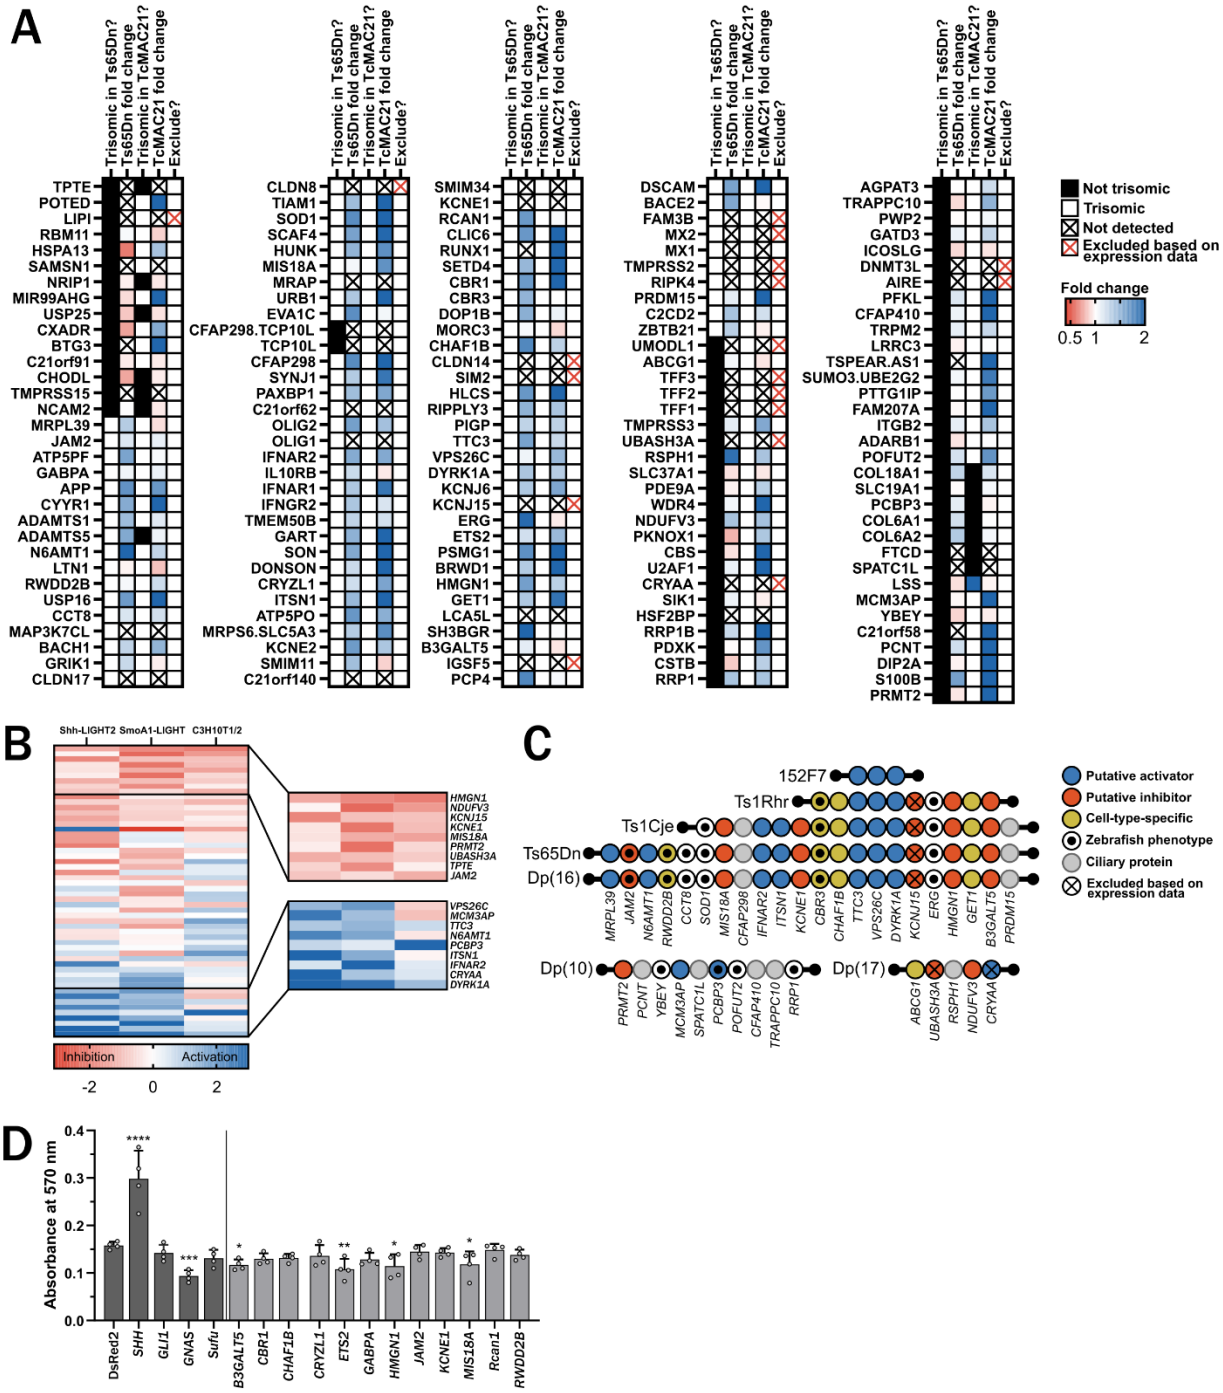

365

366 **Fig.6. Prioritization of candidate cDNAs and overexpression in primary granule cell**

367 **precursors. (A) Summary of expression data in developing cerebellum. Black boxes indicate**

368 genes that are not trisomic in Ts65Dn and TcMAC21 mouse models, and white boxes indicate  
369 genes that are trisomic in these models. Fold change is indicated by color with red signifying  
370 decreased expression and blue signifying increased expression. Transcripts with black crosses  
371 were not detected in our RNA-seq dataset, and transcripts with red crosses were excluded based  
372 on our expression data, expression in the BrainSpan Atlas of the Developing Human Brain, and  
373 single cell RNA-seq data from euploid mouse granule cell precursors and granule cells. **(B)**  
374 Comparison of the effects of 54 chromosome 21 cDNAs in Shh-LIGHT2, SmoA1-LIGHT, and  
375 C3H10T1/2 screens. cDNAs are sorted by average z-score with red signifying inhibition and  
376 blue signifying activation of the SHH pathway. Inset shows top and bottom ranked cDNAs. **(C)**  
377 Chromosomal locations of the mouse orthologs of candidate cDNAs in Down syndrome mouse  
378 models. *LINC00313* (*C21ORF84*) and *TPTE* are not shown. *LINC00313*, which was identified in  
379 the zebrafish screen, is a human-specific gene and not present in the listed mouse models. *TPTE*  
380 is located on the short arm of human chromosome 21 and has a putative homolog on mouse  
381 chromosome 8. **(D)** Lentiviral overexpression of candidate genes inhibits proliferation of granule  
382 cell precursors treated with 6 nM SAG and pulsed with EdU for 24 hours (n=4). \*\*\*\*P <0.0001,  
383 \*\*\*P<0.001, \*\*P<0.01, \*P<0.05 (one-way ANOVA followed by Fisher's LSD test). Differences  
384 reported as statistically significant have q<0.05.

385

## 386 DISCUSSION

387 Our data provide novel insights into the complex genetic architecture of aberrant SHH  
388 signaling in Down syndrome. We previously showed that a reduced mitogenic response to SHH  
389 underlies cerebellar hypoplasia in Ts65Dn mice but lacked a clear understanding of which  
390 trisomic genes contribute to this phenotype (5). In this study, we prioritized chromosome 21  
391 genes that consistently modulate SHH signaling in a variety of cellular contexts and identified  
392 four genes (*B3GALT5*, *ETS2*, *HMGNI*, and *MIS18A*) that impair the proliferation of cerebellar  
393 granule cell precursors when individually overexpressed (**fig. S7**).

394 In contrast to previous hypothesis-driven approaches, our study provides quantitative data  
395 about the individual effects of nearly all chromosome 21 protein-coding genes conserved  
396 between human and mouse. While trisomy of any chromosome has the potential to impair  
397 proliferation via aneuploidy stress, our data show that overexpression of specific chromosome 21  
398 genes inhibits the proliferation of granule cell precursors (45). In fact, overexpression of 127 of  
399 the 163 cDNAs had no effect in the luciferase, zebrafish, C3H10T1/2, or granule cell precursor  
400 assays, indicating that cDNA overexpression does not have a non-specific effect on SHH  
401 signaling and, barring genetic interactions, excludes these genes as candidates. Lack of effect in  
402 our SHH screens does not eliminate them as contributors to a general destabilization of the  
403 trisomic transcriptome, nor does it consider effects in the context of a transcriptome destabilized  
404 by trisomy for individually benign trisomic genes.

405 Our results provide evidence for why Down syndrome mouse models present with  
406 variable severities of cerebellar hypoplasia (**Fig. 1**). Ts65Dn mice and Ts1Cje mice possess a  
407 similar reduction of cerebellar volume normalized to total brain volume (7, 11, 12, 46-49).  
408 Ms1Cje/Ts65Dn mice do not show substantial cerebellar hypoplasia, although only three



409 trisomic animals were analyzed (46). Ts1Rhr mice show more subtle cerebellar hypoplasia than  
410 Ts65Dn and Ts1Cje mice (47, 50). Comparing these four models suggests that at least one gene  
411 in the region that is trisomic in both Ts1Cje and Ts65Dn mice but is not trisomic in Ts1Rhr mice  
412 (*Sod1* to *Setd4* and *Ripk4* to *Zbtb21*) contributes to cerebellar hypoplasia. An additional gene or  
413 genes may contribute to the mild cerebellar hypoplasia observed in Ts1Rhr mice (*Cbr1* to  
414 *Fam243b*). 152F7 mice, which contain a YAC with *PIGP*, *TTC3*, *VPS26C*, and *DYRK1A*, show  
415 increased cerebellar volume relative to control, suggesting that overexpression of this region  
416 provides a compensatory effect (51). Although Tc1 mice also display cerebellar hypoplasia,  
417 interpreting the genetic contributions to this phenotype is challenging due to mosaicism and  
418 complex rearrangements in the Tc1 human chromosome (52, 53). Overexpression of *PCP4*,  
419 Purkinje cell protein 4, does not affect cerebellar volume (54).

420 The results from our SHH screen are consistent with a model in which *B3galt5*, *Ets2*,  
421 *Hmgn1*, and *Mis18a* contribute to the severe cerebellar hypoplasia observed in Ts65Dn and  
422 Ts1Cje mice, *Hmgn1* and *Ets2* contribute to the milder hypoplasia in Ts1Rhr mice, and *Ttc3*,  
423 *Vps26c*, and *Dyrk1a* provide a compensatory effect in Ts65Dn, Ts1Cje, Ts1Rhr, and 152F7  
424 mice. Differences in gene content may also explain why relatively mild cerebellar hypoplasia  
425 was reported in Dp(16)1Yey and in TcMAC21 mice, despite these models containing more  
426 trisomic genes than either Ts65Dn or Ts1Cje (42, 55). For example, overexpression of  
427 *MCM3AP*, a putative activator of SHH signaling and MMU10 ortholog, could provide a  
428 compensatory effect in TcMAC21 cerebellum.

429 Interpreting the contributions of trisomic genes to cerebellar hypoplasia is further  
430 complicated by differences in expression of trisomic genes between models. TcMAC21 and Tc1  
431 models rely on appropriate function of human DNA regulatory elements in mouse cells, and

432 gene expression may differ between models with segmental duplications (e.g., Dp(16)1Yey and  
433 Ts1Rhr) versus freely segregating chromosomes (Ts65Dn) (56). For example, we found that  
434 *B3GALT5*, a putative inhibitor of SHH signaling, has a fold change of 0.92 in TcMAC21 despite  
435 this model having two copies of mouse *B3galt5* and one copy of human *B3GALT5*. Moreover,  
436 although our SHH screen and RNA-seq data support an oligogenic or polygenic explanation for  
437 cerebellar hypoplasia in mouse models, testing this hypothesis by returning candidate genes to  
438 disomy would be technically challenging due to difficult husbandry, relatively subtle  
439 phenotypes, and high interindividual variability (57, 58).

440 The molecular mechanisms by which chromosome 21 genes inhibit SHH signaling merit  
441 additional exploration. It is surprising that overexpression of several known ciliary genes  
442 (*CFAP298*, *CFAP410*, *RSPHI*, *SPATC1L*, and *TRAPPC10*) had no effect in our luciferase  
443 screens, consistent with a previous report that overexpression of *CFAP298*, *CFAP410*, and  
444 *TRAPPC10* did not alter cilia formation (23). Instead, we identified a number of regulators of  
445 mitosis and chromatin structure, including *CHAF1B*, *HMGNI*, *MCM3AP*, *MIS18A*, and  
446 *N6AMT1*, two involved in endocytosis, *ITSNI* and *VPS26C*, and a cholesterol transporter,  
447 *ABCG1*. These results suggest that rather than inhibiting the canonical SHH pathway directly,  
448 overexpression of some chromosome 21 genes may affect cell state, epigenetic regulation, and  
449 progression through the cell cycle. This hypothesis is supported by differential expression of  
450 chromatin regulators in Ts65Dn cerebellum and gene set enrichment analysis showing reduced  
451 expression of transcripts encoding mitotic proteins.

452 A promising candidate for disruption of normal chromatin structure is *HMGNI*, which  
453 was overexpressed in Ts65Dn cerebellum and inhibited SHH signaling when overexpressed in  
454 Shh-LIGHT2 and SmoA1-LIGHT cells, C3H10T1/2 cells, and primary granule cell precursors.

455 In our previous zebrafish screen, only nine of 120 embryos survived injection of 50 pg *HMGNI*  
456 mRNA, and of the nine surviving embryos, four had missing melanocytes (29). However, this  
457 finding was not reproduced in a secondary screen. In *Xenopus laevis*, injection of HMGNI  
458 protein causes body axis curvature, cyclopia, and microcephaly, which are all phenotypes  
459 associated with aberrant SHH signaling (59). *Hmgn1* is expressed in the pharyngeal arches of  
460 *Xenopus* embryos, and knockdown of *Hmgn1* disrupts cranial neural crest streams, resulting in  
461 hypoplastic craniofacial cartilage (60).

462 *HMGNI* encodes a non-histone chromosomal protein that competes for binding with  
463 histone H1 (61). Binding of HMGNI reduces chromatin compaction and is associated with  
464 lineage-specific regulatory elements (62). HMGNI expression levels are correlated with the  
465 transition from proliferation to differentiation in stem cells, and in primary rat osteoblasts,  
466 *Hmgn1* is preferentially expressed in proliferating cells with a decline in expression at the onset  
467 of mineralization (63). Loss of *Hmgn1* and *Hmgn2* in mouse embryonic fibroblasts increases the  
468 efficiency of reprogramming into iPSCs, suggesting that HMGN proteins help to stabilize cell  
469 identity (62). In B cells, *HMGNI* overexpression results in a loss of H3K27me3, a gain of  
470 H3K27ac, and a global increase in transcription (64, 65). HMGNs act upstream of *Olig1* and  
471 *Olig2* during oligodendrocyte differentiation, indicating a possible interplay between SHH  
472 signaling, *HMGNI*, and *OLIG1/2* during neurodevelopment (13, 66). Together, the known roles  
473 of HMGNI suggest that HMGNI overexpression could disrupt the proliferation of granule cell  
474 precursors by altering epigenetic marks, disrupting the balance of proliferation and  
475 differentiation (e.g., precocious differentiation), or promoting differentiation along an alternative  
476 cell state trajectory, such as differentiation into astrocytes (67).

477 Our screen focused on inhibitors of SHH activity, but several chromosome 21 cDNAs  
478 consistently activated SHH signaling across cell types. Therapeutic interventions targeting  
479 trisomic activators of SHH could worsen SHH-associated phenotypes in people with Down  
480 syndrome. In particular, *DYRK1A* stimulated SHH signaling in our luciferase screens and was  
481 previously reported to activate SHH by phosphorylating GLI1 and promoting its retention in the  
482 nucleus (20, 68). Overexpression of *DYRK1A* was previously reported to induce osteoblast  
483 differentiation of C3H10T1/2 cells (68), though this activation did not reach statistical  
484 significance in our screen. *DYRK1A* is commonly proposed as a target for treating Down  
485 syndrome-associated intellectual disability (69, 70), but we recommend monitoring potential  
486 worsening of phenotypes in SHH-responsive tissues, such as the cerebellum, heart, and bone, in  
487 preclinical studies of *DYRK1A* inhibitors (71-75).

488 Our screening paradigm made significant progress towards understanding how the  
489 overexpression of chromosome 21 genes influences SHH signaling. However, no cell culture  
490 methods can fully represent the complex effects of trisomy 21 on human development.  
491 Individual overexpression of cDNAs cannot reproduce the effects of simultaneous  
492 overexpression of chromosome 21 genes in the context of trisomy or detect genetic interactions  
493 between sets of trisomic genes. Our library contains most conserved chromosome 21 protein-  
494 coding genes but does not include several genes that may influence neurodevelopment, including  
495 *PCNT* and *SON* (23, 76-78). Transient transfection likely causes supraphysiological  
496 overexpression of cDNAs, and we did not comprehensively confirm expression of each cDNA,  
497 leading to possible false negatives. Lastly, overexpression of some cDNAs may cause lethality  
498 rather than inhibiting SHH directly. Overexpression of potassium channel subunits *KCNE1* and  
499 *KCNJ15* and the mitochondrial subunit *NDUFV3* inhibited SHH but also affected viability in

500 C3H10T1/2 cells. Future work must confirm that candidate genes modulate SHH in vivo and at  
501 expression levels mirroring the expected ~1.5-fold increase observed in trisomy.

502 Our study established *B3GALT5*, *ETS2*, *HMGNI*, and *MISI8A* as likely regulators of  
503 proliferation in the developing cerebellum. However, despite completing three parallel screens  
504 and a secondary screen, we lack a simplistic answer as to how trisomy 21 causes cerebellar  
505 hypoplasia in people with Down syndrome. Much research has devoted itself to identifying “the”  
506 chromosome 21 gene responsible for each Down syndrome-associated phenotype. Current  
507 methods, such as mapping panels and returning trisomic genes to disomy in the context of  
508 trisomy, are ill equipped to deal with complex genetic interactions and compensatory effects.  
509 Our findings suggest that for developmental phenotypes like intellectual disability, determining  
510 the individual effects of trisomic genes across the lifetime may require the development and  
511 application of new techniques and the reframing of Down syndrome as a complex genetic  
512 disorder.

## 513 **MATERIALS AND METHODS**

### 514 **Animals**

515 All procedures met the requirements of the National Institutes of Health Guide for the Care and  
516 Use of Laboratory Animals and were approved by and carried out in compliance with the Johns  
517 Hopkins University Animal Care and Use Committee. Founder B6EiC3H-a/A-Ts65Dn Stock  
518 No. 001924 (Ts65Dn) mice were obtained from The Jackson Laboratory and maintained as an  
519 advanced intercross on a C57BL/6J × C3H/HeJ genetic background. These mice represent the  
520 original Davisson strain (79-81). TcMAC21 mice were generated as previously described and  
521 maintained on a C57BL/6J (B6) × DBA/2J (D2) background (42). Ts65Dn mice were genotyped  
522 by PCR and TcMAC21 mice were genotyped by GFP fluorescence. For RNA-seq, cerebella

523 from pairs of trisomic pups and euploid littermates were isolated from two (Ts65Dn) or three  
524 (TcMAC21) litters. Euploid pups for granule cell precursors were C57BL/6J × C3H/HeJ, and  
525 cerebella of both sexes were pooled within litters. All experiments were performed on postnatal  
526 day 6 (P6).

## 527 **Plasmids**

528 Luciferase assays were carried out using the Hsa21 Gene Expression Set in the pCSDest2 vector  
529 (<https://www.addgene.org/kits/reeves-hsa21-set/>). cDNAs for the C3H10T1/2 differentiation  
530 assay were subcloned into the pcDNA™6.2/EmGFP-Bsd/V5-DEST vector (Invitrogen, V36620)  
531 and included full length cDNAs for KCNE1, DOP1B, and Rcan1, which were truncated in our  
532 original pCSDest2 cDNA library. cDNAs for lentiviral transduction were subcloned into the  
533 plenti-CAG-gate-FLAG-IRES-GFP vector. The plenti-CAG-gate-FLAG-IRES-GFP vector was a  
534 gift from William Kaelin (Addgene plasmid #107398; <http://n2t.net/addgene:107398>;  
535 RRID:Addgene\_107398) (82). To facilitate efficient subcloning, the vector's kanamycin  
536 resistance gene was replaced with the ampicillin resistance gene from the pcDNA™6.2/EmGFP-  
537 Bsd/V5-DEST vector by digesting both vectors with BspHI and ligating with T4 DNA ligase.  
538 Unless otherwise noted, Hsa21 cDNAs were acquired from the Hsa21 Gene Expression Set as  
539 previously described and subcloned using Gateway cloning (29). JAM2 was obtained from the  
540 Hsa21 Gene Expression Set and subcloned using TOPO cloning. KCNE1 (ThermoFisher,  
541 Ultimate ORF Clone IOH54610) and TRAPPC10 (ThermoFisher, Ultimate ORF Clone  
542 IOH53207) in pENTR221 were obtained from Johns Hopkins University Hit Genomics Services.  
543 mRcan1 (Dharmacon, Mammalian Gene Collection 4236038) in pCMV-SPORT6 was subcloned  
544 using TOPO cloning. DOP1B (HsCD00431873) in pENTR223.1 was obtained from The  
545 ORFeome Collaboration and subcloned using TOPO cloning.

546 pENTR-DsRed2 N1 (CMB1) was a gift from Eric Campeau (Addgene plasmid #22523;  
547 <http://n2t.net/addgene:22523>; RRID:Addgene\_22523). pDONR223\_GLI1\_WT was a gift from  
548 Jesse Boehm & William Hahn & David Root (Addgene plasmid #82123;  
549 <http://n2t.net/addgene:82123>; RRID:Addgene\_82123) (83). pEGFPC3-mSufu was a gift from  
550 Aimin Liu (Addgene plasmid #65431; <http://n2t.net/addgene:65431>; RRID:Addgene\_65431) and  
551 was subcloned using TOPO cloning (84). GNAS (HsCD00288799) in pENTR223 was obtained  
552 from The ORFeome Collaboration and subcloned using TOPO cloning. SHH (HsCD00082632)  
553 in pENTR223.1 was obtained from The ORFeome Collaboration. MOSMO (EX-H4481-M02) in  
554 pReceiver-M02 was obtained from GeneCopoeia. pMD2.G was a gift from Didier Trono  
555 (Addgene plasmid #12259; <http://n2t.net/addgene:12259>; RRID:Addgene\_12259). psPAX2 was  
556 a gift from Didier Trono (Addgene plasmid #12260; <http://n2t.net/addgene:12260>;  
557 RRID:Addgene\_12260). Plasmids for transfection were purified using endotoxin-free midiprep  
558 kits.

## 559 **Cell culture**

560 Shh-LIGHT2 and SmoA1-LIGHT were gifts from Philip Beachy and colleagues and were  
561 derived from the original stocks created by this group at Johns Hopkins University (15). Shh-  
562 LIGHT2 and SmoA1-LIGHT cells were grown in Dulbecco's Modified Eagle's Medium  
563 (DMEM; Gibco, 11965092) supplemented with 10% calf serum (Sigma, C8056 or N4637) and  
564 1% penicillin-streptomycin (Quality Biological, 50-751-7267). Shh-LIGHT2 cultures were kept  
565 under antibiotic selection with 400 µg/mL Geneticin (Gibco, 10131035) and 150 µg/mL Zeocin  
566 (Invitrogen, R25001) and SmoA1-LIGHT cells were cultured with 400 µg/mL Geneticin and 100  
567 µg/ml Hygromycin B (Corning, 30-240-CR). C3H10T1/2 cells (ATCC, CCL-226) were  
568 maintained in DMEM supplemented with 10% fetal bovine serum (HyClone, SH30071.03), 2

569 mM L-Glutamine (Quality Biological, 118-084-721), and 1% penicillin-streptomycin. 293FT  
570 cells (Invitrogen, R70007) were maintained in DMEM with 10% FBS, 0.1 mM MEM Non-  
571 Essential Amino Acids (Gibco, 1114050), 6 mM L-glutamine, 1 mM MEM sodium pyruvate  
572 (Sigma, S8636), and 1% penicillin-streptomycin with 500 ug/mL Geneticin. Primary granule cell  
573 precursors were maintained in neurobasal medium (Gibco, 21103049) with 2 mM Glutamax  
574 (Gibco, 35050061), 1% penicillin-streptomycin, 1 mM sodium pyruvate (Sigma, S8636), and 2%  
575 B27 (Gibco, 12587010) with 6 nM SAG (Calbiochem, 566661).

### 576 **Luciferase reporter assays**

577 To quantify hedgehog pathway activity in Shh-LIGHT2, cells were removed from antibiotic and  
578 seeded in 96-well plates at densities allowing them to reach confluence within four days. Two  
579 days after seeding, cells were transfected with GFP (100 ng/well; 2-3 rows; 16-24 wells or  
580 technical replicates) or one of five Hsa21 genes (100 ng/well; 1 row, 8 wells or technical  
581 replicates per unique cDNA) using Lipofectamine 2000 (Invitrogen, 11668030) according to  
582 manufacturer's instructions. On day four, media was refreshed with DMEM containing 0.5% calf  
583 serum and 100 nM or 1  $\mu$ M SAG. After forty-eight hours, cells were lysed and Fluc/Rluc activity  
584 was quantified using the Dual-Luciferase Reporter Assay System (Promega, E1910) and a 1450  
585 MicroBeta Luminescence Counter (PerkinElmer). For the SmoA1-LIGHT screen, cells were  
586 seeded in 96-well plates at densities that would allow them to reach confluence within two days.  
587 One day after seeding, cells were transfected overnight with GFP or one of five Hsa21 genes and  
588 then switched to 0.5% calf serum media for twenty-four hours before quantification of Fluc/Rluc  
589 activity.

590 For both Shh-LIGHT2 and SmoA1-LIGHT screens, the Fluc/Rluc activity was normalized to the  
591 median value of the 96-well plate (intra-plate median centering). This process: 1) takes into



592 account differences in the absolute intensity values between plates, 2) controls for unintended  
593 spatial gradients within plates, such as those that occur along the periphery, and 3) buffers  
594 against the presence of signaling outliers. Normalized values were then averaged for each Hsa21  
595 cDNA or control gene. At minimum, all experiments were conducted with sets of 8 transfected  
596 wells. Technical replicates were averaged and Z-scores were calculated for each cDNA (32).  
597 For validation studies of Shh-LIGHT2, cells were cultured to confluency in 96-well plates then  
598 treated with 1 uM SAG, 1 uM fluocinonide (Sigma SML0099), 1 uM fluticasone (Sigma,  
599 F9428), or 10 uM vitamin D3 (Sigma, C9756) in DMEM containing 0.5% calf serum.

### 600 **C3H10T1/2 differentiation**

601 To quantify osteoblast differentiation following transfection of Hsa21 cDNAs, 5k C3H10T1/2  
602 cells were seeded into each well of a 96-well plate. Twenty-four hours later, cells were  
603 transfected with 100 ng plasmid DNA per well using Lipofectamine 3000 according to  
604 manufacturer's instructions (Invitrogen, L3000008). The position of each cDNA was randomized  
605 between experiments to minimize positional effects. Transfection efficiency was monitored in  
606 live cells via GFP expression. Twenty-four hours after transfection, cells were treated with plain  
607 media, 200 nM SAG, 2 uM cyclopamine (Calbiochem, 239806), or 200 nM SAG plus 2 uM  
608 cyclopamine. Four days after treatment, cells were washed with PBS and lysed with 50 ul  
609 passive lysis buffer (Promega, E194A) for 45 minutes. To quantify alkaline phosphatase activity,  
610 200 ul alkaline phosphatase blue microwell substrate (Sigma, AB0100) was added to each well,  
611 and the plate was incubated in the dark for 30 minutes. Color development was measured using a  
612 SpectraMax 340 Microplate Reader (Molecular Devices) at 600 nm.  
613 cDNAs were screened in two sets for a total of twenty independent replicates per chromosome  
614 21 cDNA. Alkaline phosphatase activity was normalized to the median value of each plate. Cell

615 viability was assessed 48, 72, and 96 hours after transfection using the MTT Cell Proliferation  
616 Assay kit (ATCC, 30-1010K) according to manufacturer's instructions.

617 To stain cells for alkaline phosphatase activity, cells were fixed with 10% neutral buffered  
618 formalin (Sigma, HT501320) for one minute, permeabilized with 0.05% Tween-20 (Sigma,  
619 P9416) in PBS, and labeled with BCIP/NBT alkaline phosphatase substrate (Sigma, B5655).  
620 Cells were counterstained with nuclear fast red (Amresco, 1B1369) and dehydrated before  
621 mounting.

## 622 **RNA-seq**

623 RNA-seq was performed essentially as previously described (42). Briefly, RNA from P6  
624 cerebella was extracted and library preparation was conducted using the NEBNext® Poly(A)  
625 mRNA Magnetic Isolation Module (E7490) and NEBNext® Ultra™ II RNA Library Prep Kit  
626 for Illumina® (E7770). Library quality was assessed with an Agilent 2100 Bioanalyzer. Libraries  
627 were sequenced by the Johns Hopkins Single Cell & Transcriptomics Core (NovaSeq SP run, 50  
628 bp paired-end reads) for an average of ~54 million reads per sample.

629 Sequencing reads were mapped to the mouse genome mm39 modified by appending human  
630 chromosome 21, using the alignment tool STAR v.2.4.2a (85). The aligned reads were assembled  
631 with PsiCLASS v.1.0.2 (86) to create gene and transcript models. Unlike traditional transcript  
632 assemblers that process each sample separately, PsiCLASS simultaneously analyzes all samples  
633 in the experiment to produce a unified set of transcript annotations to use in the subsequent  
634 differential analyses. Transcripts were then assigned to known reference genes from the NCBI  
635 RefSeq databases (mouse release October 2020 and human release May 2021). Lastly, DESeq2  
636 (87) was used to quantify the expression levels and determine the sets of differentially expressed  
637 genes. Additional visualizations, including plots of principal coordinate analysis (PCA)

638 components, were visualized with custom R scripts. For comparison of human and mouse  
639 orthologs in the TcMAC21 model, trisomic counts were first length normalized using the  
640 formula  $\text{len\_norm\_readcounts} = 50 \times \text{readcounts}/\text{genelen}$ . Human and mouse counts for each  
641 gene were then summed, and fold changes were reported as a ratio of TcMAC21 counts to  
642 euploid. Gene ontology and gene set enrichment analyses were performed using the R packages  
643 gprofiler2 v.0.2.1 (88), GSVA v.1.42.0 (89), GSEABase v.1.56.0, and clusterProfiler v.4.4.1  
644 (90). Canonical pathways (reactome) gene set for gene set enrichment analysis was retrieved  
645 using the msigdb R package v.7.4.1. Other R packages used to analyze and visualize RNA-seq  
646 data include tidyverse v.1.3.1 (91), cowplot v.1.1.1, ggbreak v.0.0.9 (92), ggrepel v.0.9.1,  
647 RColorBrewer v.1.1-2, gplots v.3.1.3, and enrichplot v.1.14.2 with scripts from  
648 DIY.transcriptomics (93).

#### 649 **Lentiviral production**

650 750k low-passage 293FT cells were seeded into each well of a 6-well plate coated with poly-L-  
651 ornithine (Sigma, P2533). One day after seeding, cells were transfected with 640 ng pMD2.G,  
652 975 ng psPAX, and 1275 ng lentiviral target plasmid using Lipofectamine 2000 and PLUS  
653 reagent (Invitrogen, 11514015). Media was refreshed four hours after transfection. Supernatant  
654 was collected 48 and 72 hours post transfection, filtered with a 0.45 um filter (Millex-HV,  
655 SLHV013SL), and concentrated with Lenti-X Concentrator (Takara, 631231) according to  
656 manufacturer's instructions. Physical titer was determined using the Lenti-X p24 Rapid Titer Kit  
657 (Takara, 632200) and granule cell precursors were transduced at an estimated MOI of ~4.

#### 658 **Granule cell precursor isolation**

659 Cerebella from P6 pups were dissected into ice-cold Hanks' Balanced Salt Solution (HBSS;  
660 Gibco, 14170112) with 0.6% glucose, digested with papain (Worthington Papain Dissociation

661 System, LK003150), and triturated with a serum-coated pipette (94). Dissociated cells were  
662 isolated from membrane fragments on an albumin-ovomucoid inhibitor discontinuous density  
663 gradient. Granule cell precursors were further purified on a 35%/60% Percoll gradient (Sigma,  
664 E0414). Viable cells were counted with a Countess II Automated Cell Counter (ThermoFisher,  
665 A27978), and 100k cells were seeded into each well of a 96-well plate coated with poly-L-lysine  
666 (Sigma, P4832).

#### 667 **Granule cell precursor EdU incorporation assay**

668 Twenty-four hours after seeding, granule cell precursors were transduced with lentiviral  
669 particles. Infection was monitored via expression of GFP from the IRES-GFP construct. One day  
670 after transduction, media was refreshed with neurobasal media containing 6 nM SAG. Two days  
671 after transduction, cells were treated with 15  $\mu$ M EdU for twenty-four hours. EdU incorporation  
672 was quantified using the Click-iT™ EdU Proliferation Assay for Microplates kit (Invitrogen,  
673 C10499) according to manufacturer's instructions.

#### 674 **Statistical analysis**

675 Statistical analyses were performed using GraphPad Prism 9.1.2 or R version 4.1.3. For  
676 luciferase screens, z-scores were calculated by comparing the Fluc/Rluc ratio for each cDNA to  
677 the set of all screened cDNAs. For C3H10T1/2 alkaline phosphatase screen, non-parametric  
678 Kruskal-Wallis test was followed by Dunn's post-hoc test comparing GFP control to all other  
679 cDNAs. All other assays were analyzed with two-tailed unpaired Student's t-test, one-way  
680 ANOVA, or two-way ANOVA as noted. P-values were corrected for multiple comparisons by  
681 controlling the false discovery rate using the two-stage linear step-up procedure of Benjamini,  
682 Krieger and Yekutieli.

683 **Supplementary Materials**

684 Fig. S1. Shh-LIGHT2 and SmoA1-LIGHT screens.

685 Fig. S2. C3H10T1/2 osteoblast differentiation and viability following transfection of  
686 chromosome 21 cDNAs.

687 Fig. S3. Expression of disomic genes in Ts65Dn and TcMAC21 cerebellum.

688 Fig. S4. Unsupervised clustering of differentially expressed genes in Ts65D and TcMAC21  
689 samples.

690 Fig. S5. Gene ontology and gene set enrichment analyses of differentially expressed genes in  
691 Ts65Dn cerebellum.

692 Fig. S6. Differentially expressed genes in Ts65Dn cerebellum are implicated in human  
693 neurodevelopmental disorders, mitosis, and chromatin remodeling.

694 Fig. S7. Summary of effects of *HMGNI*, *MIS18A*, *B3GALT5*, and *ETS2* on SHH pathway  
695 activation.

696 Table S1. Cerebellar Volumes of Down Syndrome Models

697 Table S2. Manual Annotation of HSA21 Genes

698 Table S3. Plasmid Information

699 Table S4. Shh-LIGHT2 Screen

700 Table S5. SmoA1-LIGHT Screen

701 Table S6. Screen Comparisons

702 Table S7. Ts65Dn RNA-seq in P6 Cerebellum

703 Table S8. TcMAC21 RNA-seq in P6 Cerebellum

704 Table S9. Gene Set Enrichment Analysis in Ts65Dn Cerebellum

705 Table S10. Summary of Expression Data in Human and Mouse Cerebellum

706 **References and Notes:**

- 707 1. M. Gupta, A. R. Dhanasekaran, K. J. Gardiner, Mouse models of Down syndrome: gene  
708 content and consequences. *Mamm Genome* **27**, 538-555 (2016); published online  
709 EpubDec (10.1007/s00335-016-9661-8).
- 710 2. C. J. Epstein, in *The Online Metabolic and Molecular Bases of Inherited Disease*, D. L.  
711 Valle, S. Antonarakis, A. Ballabio, A. L. Beaudet, G. A. Mitchell, Eds. (McGraw-Hill  
712 Education, New York, NY, 2019).
- 713 3. A. J. Moyer, K. Gardiner, R. H. Reeves, All Creatures Great and Small: New Approaches  
714 for Understanding Down Syndrome Genetics. *Trends Genet* **37**, 444-459 (2021);  
715 published online EpubMay (10.1016/j.tig.2020.09.017).
- 716 4. D. G. Currier, R. C. Polk, R. H. Reeves, A Sonic hedgehog (Shh) response deficit in  
717 trisomic cells may be a common denominator for multiple features of Down syndrome.  
718 *Prog Brain Res* **197**, 223-236 (2012)10.1016/B978-0-444-54299-1.00011-X).
- 719 5. R. J. Roper, L. L. Baxter, N. G. Saran, D. K. Klinedinst, P. A. Beachy, R. H. Reeves,  
720 Defective cerebellar response to mitogenic Hedgehog signaling in Down [corrected]  
721 syndrome mice. *Proc Natl Acad Sci U S A* **103**, 1452-1456 (2006); published online  
722 EpubJan 31 (10.1073/pnas.0510750103).
- 723 6. E. H. Aylward, R. Habbak, A. C. Warren, M. B. Pulsifer, P. E. Barta, M. Jerram, G. D.  
724 Pearlson, Cerebellar volume in adults with Down syndrome. *Arch Neurol* **54**, 209-212  
725 (1997); published online EpubFeb (10.1001/archneur.1997.00550140077016).
- 726 7. L. L. Baxter, T. H. Moran, J. T. Richtsmeier, J. Troncoso, R. H. Reeves, Discovery and  
727 genetic localization of Down syndrome cerebellar phenotypes using the Ts65Dn mouse.  
728 *Hum Mol Genet* **9**, 195-202 (2000); published online EpubJan 22 (10.1093/hmg/9.2.195).
- 729 8. R. J. Wechsler-Reya, M. P. Scott, Control of neuronal precursor proliferation in the  
730 cerebellum by Sonic Hedgehog. *Neuron* **22**, 103-114 (1999); published online EpubJan  
731 (10.1016/s0896-6273(00)80682-0).
- 732 9. V. A. Wallace, Purkinje-cell-derived Sonic hedgehog regulates granule neuron precursor  
733 cell proliferation in the developing mouse cerebellum. *Curr Biol* **9**, 445-448 (1999);  
734 published online EpubApr 22 (10.1016/s0960-9822(99)80195-x).
- 735 10. R. J. Roper, J. F. VanHorn, C. C. Cain, R. H. Reeves, A neural crest deficit in Down  
736 syndrome mice is associated with deficient mitotic response to Sonic hedgehog. *Mech*  
737 *Dev* **126**, 212-219 (2009); published online EpubMar-Apr (10.1016/j.mod.2008.11.002).
- 738 11. I. Das, J. M. Park, J. H. Shin, S. K. Jeon, H. Lorenzi, D. J. Linden, P. F. Worley, R. H.  
739 Reeves, Hedgehog agonist therapy corrects structural and cognitive deficits in a Down  
740 syndrome mouse model. *Sci Transl Med* **5**, 201ra120 (2013); published online EpubSep 4  
741 (10.1126/scitranslmed.3005983).
- 742 12. F. J. Gao, D. Klinedinst, F. X. Fernandez, B. Cheng, A. Savonenko, B. Devenney, Y. Li,  
743 D. Wu, M. G. Pomper, R. H. Reeves, Forebrain Shh overexpression improves cognitive  
744 function and locomotor hyperactivity in an aneuploid mouse model of Down syndrome  
745 and its euploid littermates. *Acta Neuropathol Commun* **9**, 137 (2021); published online  
746 EpubAug 16 (10.1186/s40478-021-01237-z).
- 747 13. J. A. Klein, Z. Li, S. Rampam, J. Cardini, A. Ayoub, P. Shaw, A. L. Rachubinski, J. M.  
748 Espinosa, E. Zeldich, T. F. Haydar, Sonic Hedgehog Pathway Modulation Normalizes  
749 Expression of Olig2 in Rostrally Patterned NPCs With Trisomy 21. *Front Cell Neurosci*  
750 **15**, 794675 (2021)10.3389/fncel.2021.794675).

- 751 14. V. Palma, D. A. Lim, N. Dahmane, P. Sanchez, T. C. Brionne, C. D. Herzberg, Y. Gitton,  
752 A. Carleton, A. Alvarez-Buylla, A. Ruiz i Altaba, Sonic hedgehog controls stem cell  
753 behavior in the postnatal and adult brain. *Development* **132**, 335-344 (2005); published  
754 online EpubJan (10.1242/dev.01567).
- 755 15. J. Taipale, J. K. Chen, M. K. Cooper, B. Wang, R. K. Mann, L. Milenkovic, M. P. Scott,  
756 P. A. Beachy, Effects of oncogenic mutations in Smoothed and Patched can be  
757 reversed by cyclopamine. *Nature* **406**, 1005-1009 (2000); published online EpubAug 31  
758 (10.1038/35023008).
- 759 16. J. Garcia-Lopez, R. Kumar, K. S. Smith, P. A. Northcott, Deconstructing Sonic  
760 Hedgehog Medulloblastoma: Molecular Subtypes, Drivers, and Beyond. *Trends Genet*  
761 **37**, 235-250 (2021); published online EpubMar (10.1016/j.tig.2020.11.001).
- 762 17. L. V. Goodrich, L. Milenkovic, K. M. Higgins, M. P. Scott, Altered neural cell fates and  
763 medulloblastoma in mouse patched mutants. *Science* **277**, 1109-1113 (1997); published  
764 online EpubAug 22 (10.1126/science.277.5329.1109).
- 765 18. G. J. Weiss, R. L. Korn, Metastatic basal cell carcinoma in the era of hedgehog signaling  
766 pathway inhibitors. *Cancer* **118**, 5310-5319 (2012); published online EpubNov 1  
767 (10.1002/ncr.27532).
- 768 19. N. Singh, T. Dutka, B. M. Devenney, K. Kawasaki, R. H. Reeves, J. T. Richtsmeier,  
769 Acute upregulation of hedgehog signaling in mice causes differential effects on cranial  
770 morphology. *Dis Model Mech* **8**, 271-279 (2015); published online EpubMar  
771 (10.1242/dmm.017889).
- 772 20. B. K. Ehe, D. R. Lamson, M. Tarpley, R. U. Onyenwoke, L. M. Graves, K. P. Williams,  
773 Identification of a DYRK1A-mediated phosphorylation site within the nuclear  
774 localization sequence of the hedgehog transcription factor GLI1. *Biochem Biophys Res*  
775 *Commun* **491**, 767-772 (2017); published online EpubSep 23  
776 (10.1016/j.bbrc.2017.07.107).
- 777 21. S. Garcia-Cerro, V. Vidal, S. Lantigua, M. T. Berciano, M. Lafarga, P. Ramos-Cabrer, D.  
778 Padro, N. Rueda, C. Martinez-Cue, Cerebellar alterations in a model of Down syndrome:  
779 The role of the Dyrk1A gene. *Neurobiol Dis* **110**, 206-217 (2018); published online  
780 EpubFeb (10.1016/j.nbd.2017.12.002).
- 781 22. P. Schneider, J. M. Bayo-Fina, R. Singh, P. Kumar Dhanyamraju, P. Holz, A. Baier, V.  
782 Fendrich, A. Ramaswamy, S. Baumeister, E. D. Martinez, M. Lauth, Identification of a  
783 novel actin-dependent signal transducing module allows for the targeted degradation of  
784 GLI1. *Nat Commun* **6**, 8023 (2015); published online EpubAug 27  
785 (10.1038/ncomms9023).
- 786 23. D. F. Galati, K. D. Sullivan, A. T. Pham, J. M. Espinosa, C. G. Pearson, Trisomy 21  
787 Represses Cilia Formation and Function. *Dev Cell* **46**, 641-650 e646 (2018); published  
788 online EpubSep 10 (10.1016/j.devcel.2018.07.008).
- 789 24. A. Giacomini, F. Stagni, S. Trazzi, S. Guidi, M. Emili, E. Brigham, E. Ciani, R.  
790 Bartesaghi, Inhibition of APP gamma-secretase restores Sonic Hedgehog signaling and  
791 neurogenesis in the Ts65Dn mouse model of Down syndrome. *Neurobiol Dis* **82**, 385-  
792 396 (2015); published online EpubOct (10.1016/j.nbd.2015.08.001).
- 793 25. J. O. Korbel, T. Tirosh-Wagner, A. E. Urban, X. N. Chen, M. Kasowski, L. Dai, F.  
794 Grubert, C. Erdman, M. C. Gao, K. Lange, E. M. Sobel, G. M. Barlow, A. S. Aylsworth,  
795 N. J. Carpenter, R. D. Clark, M. Y. Cohen, E. Doran, T. Falik-Zaccari, S. O. Lewin, I. T.  
796 Lott, B. C. McGillivray, J. B. Moeschler, M. J. Pettenati, S. M. Puschel, K. W. Rao, L.

- 797 G. Shaffer, M. Shohat, A. J. Van Riper, D. Warburton, S. Weissman, M. B. Gerstein, M.  
798 Snyder, J. R. Korenberg, The genetic architecture of Down syndrome phenotypes  
799 revealed by high-resolution analysis of human segmental trisomies. *Proc Natl Acad Sci U*  
800 *S A* **106**, 12031-12036 (2009); published online EpubJul 21 (10.1073/pnas.0813248106).
- 801 26. J. R. Korenberg, X. N. Chen, R. Schipper, Z. Sun, R. Gonsky, S. Gerwehr, N. Carpenter,  
802 C. Daumer, P. Dignan, C. Disteché, et al., Down syndrome phenotypes: the consequences  
803 of chromosomal imbalance. *Proc Natl Acad Sci U S A* **91**, 4997-5001 (1994); published  
804 online EpubMay 24 (10.1073/pnas.91.11.4997).
- 805 27. C. J. Westlake, L. M. Baye, M. V. Nachury, K. J. Wright, K. E. Ervin, L. Phu, C.  
806 Chalouni, J. S. Beck, D. S. Kirkpatrick, D. C. Slusarski, V. C. Sheffield, R. H. Scheller,  
807 P. K. Jackson, Primary cilia membrane assembly is initiated by Rab11 and transport  
808 protein particle II (TRAPP II) complex-dependent trafficking of Rabin8 to the  
809 centrosome. *Proc Natl Acad Sci U S A* **108**, 2759-2764 (2011); published online EpubFeb  
810 15 (10.1073/pnas.1018823108).
- 811 28. M. Muenke, L. J. Bone, H. F. Mitchell, I. Hart, K. Walton, K. Hall-Johnson, E. F. Ippel,  
812 J. Dietz-Band, K. Kvaloy, C. M. Fan, et al., Physical mapping of the holoprosencephaly  
813 critical region in 21q22.3, exclusion of SIM2 as a candidate gene for holoprosencephaly,  
814 and mapping of SIM2 to a region of chromosome 21 important for Down syndrome. *Am*  
815 *J Hum Genet* **57**, 1074-1079 (1995); published online EpubNov (
- 816 29. S. Edie, N. A. Zaghloul, C. C. Leitch, D. K. Klinedinst, J. Lebron, J. F. Thole, A. S.  
817 McCallion, N. Katsanis, R. H. Reeves, Survey of Human Chromosome 21 Gene  
818 Expression Effects on Early Development in *Danio rerio*. *G3 (Bethesda)* **8**, 2215-2223  
819 (2018); published online EpubJul 2 (10.1534/g3.118.200144).
- 820 30. D. Ma, M. J. Cardoso, M. A. Zuluaga, M. Modat, N. M. Powell, F. K. Wiseman, J. O.  
821 Cleary, B. Sinclair, I. F. Harrison, B. Siow, K. Popuri, S. Lee, J. A. Matsubara, M. V.  
822 Sarunic, M. F. Beg, V. L. J. Tybulewicz, E. M. C. Fisher, M. F. Lythgoe, S. Ourselin,  
823 Substantially thinner internal granular layer and reduced molecular layer surface in the  
824 cerebellar cortex of the Tc1 mouse model of down syndrome - a comprehensive  
825 morphometric analysis with active staining contrast-enhanced MRI. *Neuroimage* **223**,  
826 117271 (2020); published online EpubDec (10.1016/j.neuroimage.2020.117271).
- 827 31. A. Duchon, M. Del Mar Muniz Moreno, S. Martin Lorenzo, M. P. Silva de Souza, C.  
828 Chevalier, V. Nalesso, H. Meziane, P. Loureiro de Sousa, V. Noblet, J. P. Armspach, V.  
829 Brault, Y. Herault, Multi-influential genetic interactions alter behaviour and cognition  
830 through six main biological cascades in Down syndrome mouse models. *Hum Mol Genet*  
831 **30**, 771-788 (2021); published online EpubMay 28 (10.1093/hmg/ddab012).
- 832 32. L. S. Jacob, X. Wu, M. E. Dodge, C. W. Fan, O. Kulak, B. Chen, W. Tang, B. Wang, J.  
833 F. Amatruda, L. Lum, Genome-wide RNAi screen reveals disease-associated genes that  
834 are common to Hedgehog and Wnt signaling. *Sci Signal* **4**, ra4 (2011); published online  
835 EpubJan 25 (10.1126/scisignal.2001225).
- 836 33. G. V. Pusapati, J. H. Kong, B. B. Patel, A. Krishnan, A. Sagner, M. Kinnebrew, J.  
837 Briscoe, L. Aravind, R. Rohatgi, CRISPR Screens Uncover Genes that Regulate Target  
838 Cell Sensitivity to the Morphogen Sonic Hedgehog. *Dev Cell* **44**, 113-129 e118 (2018);  
839 published online EpubJan 8 (10.1016/j.devcel.2017.12.003).
- 840 34. D. K. Breslow, S. Hoogendoorn, A. R. Kopp, D. W. Morgens, B. K. Vu, M. C. Kennedy,  
841 K. Han, A. Li, G. T. Hess, M. C. Bassik, J. K. Chen, M. V. Nachury, A CRISPR-based



- 842 screen for Hedgehog signaling provides insights into ciliary function and ciliopathies. *Nat*  
843 *Genet* **50**, 460-471 (2018); published online EpubMar (10.1038/s41588-018-0054-7).
- 844 35. T. Nakamura, T. Aikawa, M. Iwamoto-Enomoto, M. Iwamoto, Y. Higuchi, M. Pacifici,  
845 N. Kinto, A. Yamaguchi, S. Noji, K. Kurisu, T. Matsuya, Induction of osteogenic  
846 differentiation by hedgehog proteins. *Biochem Biophys Res Commun* **237**, 465-469  
847 (1997); published online EpubAug 18 (10.1006/bbrc.1997.7156).
- 848 36. T. Nakamura, M. Naruse, Y. Chiba, T. Komori, K. Sasaki, M. Iwamoto, S. Fukumoto,  
849 Novel hedgehog agonists promote osteoblast differentiation in mesenchymal stem cells. *J*  
850 *Cell Physiol* **230**, 922-929 (2015); published online EpubApr (10.1002/jcp.24823).
- 851 37. H. Roudaut, E. Traiffort, T. Gorojankina, L. Vincent, H. Faure, A. Schoenfelder, A.  
852 Mann, F. Manetti, A. Solinas, M. Taddei, M. Ruat, Identification and mechanism of  
853 action of the acylguanidine MRT-83, a novel potent Smoothed antagonist. *Mol*  
854 *Pharmacol* **79**, 453-460 (2011); published online EpubMar (10.1124/mol.110.069708).
- 855 38. G. V. Pusapati, J. H. Kong, B. B. Patel, M. Gouti, A. Sagner, R. Sircar, G. Luchetti, P.  
856 W. Ingham, J. Briscoe, R. Rohatgi, G protein-coupled receptors control the sensitivity of  
857 cells to the morphogen Sonic Hedgehog. *Sci Signal* **11**, (2018); published online  
858 EpubFeb 6 (10.1126/scisignal.aao5749).
- 859 39. A. B. Rosenberg, C. M. Roco, R. A. Muscat, A. Kuchina, P. Sample, Z. Yao, L. T.  
860 Graybuck, D. J. Peeler, S. Mukherjee, W. Chen, S. H. Pun, D. L. Sellers, B. Tasic, G.  
861 Seelig, Single-cell profiling of the developing mouse brain and spinal cord with split-pool  
862 barcoding. *Science* **360**, 176-182 (2018); published online EpubApr 13  
863 (10.1126/science.aam8999).
- 864 40. M. J. van Essen, S. Nayler, E. B. E. Becker, J. Jacob, Deconstructing cerebellar  
865 development cell by cell. *PLoS Genet* **16**, e1008630 (2020); published online EpubApr  
866 (10.1371/journal.pgen.1008630).
- 867 41. A. Duchon, M. Raveau, C. Chevalier, V. Nalesso, A. J. Sharp, Y. Herault, Identification  
868 of the translocation breakpoints in the Ts65Dn and Ts1Cje mouse lines: relevance for  
869 modeling Down syndrome. *Mamm Genome* **22**, 674-684 (2011); published online  
870 EpubDec (10.1007/s00335-011-9356-0).
- 871 42. Y. Kazuki, F. J. Gao, Y. Li, A. J. Moyer, B. Devenney, K. Hiramatsu, S. Miyagawa-  
872 Tomita, S. Abe, K. Kazuki, N. Kajitani, N. Uno, S. Takehara, M. Takiguchi, M.  
873 Yamakawa, A. Hasegawa, R. Shimizu, S. Matsukura, N. Noda, N. Ogonuki, K. Inoue, S.  
874 Matoba, A. Ogura, L. D. Florea, A. Savonenko, M. Xiao, D. Wu, D. A. Batista, J. Yang,  
875 Z. Qiu, N. Singh, J. T. Richtsmeier, T. Takeuchi, M. Oshimura, R. H. Reeves, A non-  
876 mosaic transchromosomal mouse model of down syndrome carrying the long arm of  
877 human chromosome 21. *Elife* **9**, (2020); published online EpubJun 29  
878 (10.7554/eLife.56223).
- 879 43. J. A. Miller, S. L. Ding, S. M. Sunkin, K. A. Smith, L. Ng, A. Szafer, A. Ebbert, Z. L.  
880 Riley, J. J. Royall, K. Aiona, J. M. Arnold, C. Bennet, D. Bertagnolli, K. Brouner, S.  
881 Butler, S. Caldejon, A. Carey, C. Cuhaciyani, R. A. Dalley, N. Dee, T. A. Dolbeare, B. A.  
882 Facer, D. Feng, T. P. Fliss, G. Gee, J. Goldy, L. Gourley, B. W. Gregor, G. Gu, R. E.  
883 Howard, J. M. Jochim, C. L. Kuan, C. Lau, C. K. Lee, F. Lee, T. A. Lemon, P. Lesnar, B.  
884 McMurray, N. Mastan, N. Mosqueda, T. Nalwai-Cecchini, N. K. Ngo, J. Nyhus, A. Oldre,  
885 E. Olson, J. Parente, P. D. Parker, S. E. Parry, A. Stevens, M. Pletikos, M. Reding, K.  
886 Roll, D. Sandman, M. Sarreal, S. Shapouri, N. V. Shapovalova, E. H. Shen, N. Sjoquist,  
887 C. R. Slaughterbeck, M. Smith, A. J. Sodt, D. Williams, L. Zollei, B. Fischl, M. B.

- 888 Gerstein, D. H. Geschwind, I. A. Glass, M. J. Hawrylycz, R. F. Hevner, H. Huang, A. R.  
889 Jones, J. A. Knowles, P. Levitt, J. W. Phillips, N. Sestan, P. Wahnoutka, C. Dang, A.  
890 Bernard, J. G. Hohmann, E. S. Lein, Transcriptional landscape of the prenatal human  
891 brain. *Nature* **508**, 199-206 (2014); published online EpubApr 10 (10.1038/nature13185).
- 892 44. X. He, L. Zhang, Y. Chen, M. Remke, D. Shih, F. Lu, H. Wang, Y. Deng, Y. Yu, Y. Xia,  
893 X. Wu, V. Ramaswamy, T. Hu, F. Wang, W. Zhou, D. K. Burns, S. H. Kim, M. Kool, S.  
894 M. Pfister, L. S. Weinstein, S. L. Pomeroy, R. J. Gilbertson, J. B. Rubin, Y. Hou, R.  
895 Wechsler-Reya, M. D. Taylor, Q. R. Lu, The G protein alpha subunit Galphas is a tumor  
896 suppressor in Sonic hedgehog-driven medulloblastoma. *Nat Med* **20**, 1035-1042 (2014);  
897 published online EpubSep (10.1038/nm.3666).
- 898 45. J. Zhu, H. J. Tsai, M. R. Gordon, R. Li, Cellular Stress Associated with Aneuploidy. *Dev*  
899 *Cell* **44**, 420-431 (2018); published online EpubFeb 26 (10.1016/j.devcel.2018.02.002).
- 900 46. L. E. Olson, R. J. Roper, L. L. Baxter, E. J. Carlson, C. J. Epstein, R. H. Reeves, Down  
901 syndrome mouse models Ts65Dn, Ts1Cje, and Ms1Cje/Ts65Dn exhibit variable severity  
902 of cerebellar phenotypes. *Dev Dyn* **230**, 581-589 (2004); published online EpubJul  
903 (10.1002/dvdy.20079).
- 904 47. K. Aldridge, R. H. Reeves, L. E. Olson, J. T. Richtsmeier, Differential effects of trisomy  
905 on brain shape and volume in related aneuploid mouse models. *Am J Med Genet A* **143A**,  
906 1060-1070 (2007); published online EpubMay 15 (10.1002/ajmg.a.31721).
- 907 48. J. Laffaire, I. Rivals, L. Dauphinot, F. Pasteau, R. Wehrle, B. Larrat, T. Vitalis, R. X.  
908 Moldrich, J. Rossier, R. Sinkus, Y. Herault, I. Dusart, M. C. Potier, Gene expression  
909 signature of cerebellar hypoplasia in a mouse model of Down syndrome during postnatal  
910 development. *BMC Genomics* **10**, 138 (2009); published online EpubMar 30  
911 (10.1186/1471-2164-10-138).
- 912 49. D. Wu, Y. Zhang, B. Cheng, S. Mori, R. H. Reeves, F. J. Gao, Time-dependent diffusion  
913 MRI probes cerebellar microstructural alterations in a mouse model of Down syndrome.  
914 *Brain Commun* **3**, fcab062 (2021)10.1093/braincomms/fcab062).
- 915 50. L. E. Olson, R. J. Roper, C. L. Sengstaken, E. A. Peterson, V. Aquino, Z. Galdzicki, R.  
916 Siarey, M. Pletnikov, T. H. Moran, R. H. Reeves, Trisomy for the Down syndrome  
917 'critical region' is necessary but not sufficient for brain phenotypes of trisomic mice. *Hum*  
918 *Mol Genet* **16**, 774-782 (2007); published online EpubApr 1 (10.1093/hmg/ddm022).
- 919 51. C. Sebrie, C. Chabert, A. Ledru, F. Guedj, C. Po, D. J. Smith, E. Rubin, I. Rivals, J. C.  
920 Beloeil, B. Gillet, J. M. Delabar, Increased dosage of DYRK1A and brain volumetric  
921 alterations in a YAC model of partial trisomy 21. *Anat Rec (Hoboken)* **291**, 254-262  
922 (2008); published online EpubMar (10.1002/ar.20640).
- 923 52. N. M. Powell, M. Modat, M. J. Cardoso, D. Ma, H. E. Holmes, Y. Yu, J. O'Callaghan, J.  
924 O. Cleary, B. Sinclair, F. K. Wiseman, V. L. Tybulewicz, E. M. Fisher, M. F. Lythgoe, S.  
925 Ourselin, Fully-Automated muMRI Morphometric Phenotyping of the Tc1 Mouse Model  
926 of Down Syndrome. *PLoS One* **11**, e0162974 (2016)10.1371/journal.pone.0162974).
- 927 53. S. M. Gribble, F. K. Wiseman, S. Clayton, E. Prigmore, E. Langley, F. Yang, S. Maguire,  
928 B. Fu, D. Rajan, O. Sheppard, C. Scott, H. Hauser, P. J. Stephens, L. A. Stebbings, B. L.  
929 Ng, T. Fitzgerald, M. A. Quail, R. Banerjee, K. Rothkamm, V. L. Tybulewicz, E. M.  
930 Fisher, N. P. Carter, Massively parallel sequencing reveals the complex structure of an  
931 irradiated human chromosome on a mouse background in the Tc1 model of Down  
932 syndrome. *PLoS One* **8**, e60482 (2013)10.1371/journal.pone.0060482).

- 933 54. F. Mouton-Liger, I. Sahun, T. Collin, P. Lopes Pereira, D. Masini, S. Thomas, E. Paly, S.  
934 Luilier, S. Meme, Q. Jouhault, S. Bennai, J. C. Beloeil, J. C. Bizot, Y. Herault, M.  
935 Dierssen, N. Creau, Developmental molecular and functional cerebellar alterations  
936 induced by PCP4/PEP19 overexpression: implications for Down syndrome. *Neurobiol*  
937 *Dis* **63**, 92-106 (2014); published online EpubMar (10.1016/j.nbd.2013.11.016).
- 938 55. J. M. Starbuck, T. Dutka, T. S. Ratliff, R. H. Reeves, J. T. Richtsmeier, Overlapping  
939 trisomies for human chromosome 21 orthologs produce similar effects on skull and brain  
940 morphology of Dp(16)1Yey and Ts65Dn mice. *Am J Med Genet A* **164A**, 1981-1990  
941 (2014); published online EpubAug (10.1002/ajmg.a.36594).
- 942 56. N. M. Aziz, F. Guedj, J. L. A. Pennings, J. L. Olmos-Serrano, A. Siegel, T. F. Haydar, D.  
943 W. Bianchi, Lifespan analysis of brain development, gene expression and behavioral  
944 phenotypes in the Ts1Cje, Ts65Dn and Dp(16)1/Yey mouse models of Down syndrome.  
945 *Dis Model Mech* **11**, (2018); published online EpubJun 12 (10.1242/dmm.031013).
- 946 57. R. J. Roper, H. K. St John, J. Philip, A. Lawler, R. H. Reeves, Perinatal loss of Ts65Dn  
947 Down syndrome mice. *Genetics* **172**, 437-443 (2006); published online EpubJan  
948 (10.1534/genetics.105.050898).
- 949 58. R. J. Roper, R. H. Reeves, Understanding the basis for Down syndrome phenotypes.  
950 *PLoS Genet* **2**, e50 (2006); published online EpubMar (10.1371/journal.pgen.0020050).
- 951 59. U. Korner, M. Bustin, U. Scheer, R. Hock, Developmental role of HMGN proteins in  
952 *Xenopus laevis*. *Mech Dev* **120**, 1177-1192 (2003); published online EpubOct  
953 (10.1016/j.mod.2003.07.001).
- 954 60. C. Ihewulezi, J. P. Saint-Jeannet, Function of chromatin modifier Hmgn1 during neural  
955 crest and craniofacial development. *Genesis* **59**, e23447 (2021); published online  
956 EpubOct (10.1002/dvg.23447).
- 957 61. Y. Postnikov, M. Bustin, Regulation of chromatin structure and function by HMGN  
958 proteins. *Biochim Biophys Acta* **1799**, 62-68 (2010); published online EpubJan-Feb  
959 (10.1016/j.bbagr.2009.11.016).
- 960 62. B. He, T. Deng, I. Zhu, T. Furusawa, S. Zhang, W. Tang, Y. Postnikov, S. Ambs, C. C.  
961 Li, F. Livak, D. Landsman, M. Bustin, Binding of HMGN proteins to cell specific  
962 enhancers stabilizes cell identity. *Nat Commun* **9**, 5240 (2018); published online  
963 EpubDec 7 (10.1038/s41467-018-07687-9).
- 964 63. A. R. Shakoori, T. A. Owen, V. Shalhoub, J. L. Stein, M. Bustin, G. S. Stein, J. B. Lian,  
965 Differential expression of the chromosomal high mobility group proteins 14 and 17  
966 during the onset of differentiation in mammalian osteoblasts and promyelocytic leukemia  
967 cells. *J Cell Biochem* **51**, 479-487 (1993); published online EpubApr  
968 (10.1002/jcb.2400510413).
- 969 64. C. T. Mowery, J. M. Reyes, L. Cabal-Hierro, K. J. Higby, K. L. Karlin, J. H. Wang, R. J.  
970 Kimmerling, P. Cejas, K. Lim, H. Li, T. Furusawa, H. W. Long, D. Pellman, B. Chapuy,  
971 M. Bustin, S. R. Manalis, T. F. Westbrook, C. Y. Lin, A. A. Lane, Trisomy of a Down  
972 Syndrome Critical Region Globally Amplifies Transcription via HMGN1  
973 Overexpression. *Cell Rep* **25**, 1898-1911 e1895 (2018); published online EpubNov 13  
974 (10.1016/j.celrep.2018.10.061).
- 975 65. A. A. Lane, B. Chapuy, C. Y. Lin, T. Tivey, H. Li, E. C. Townsend, D. van Bodegom, T.  
976 A. Day, S. C. Wu, H. Liu, A. Yoda, G. Alexe, A. C. Schinzel, T. J. Sullivan, S. Malinge,  
977 J. E. Taylor, K. Stegmaier, J. D. Jaffe, M. Bustin, G. te Kronnie, S. Izraeli, M. H. Harris,  
978 K. E. Stevenson, D. Neuberg, L. B. Silverman, S. E. Sallan, J. E. Bradner, W. C. Hahn, J.

- 979 D. Crispino, D. Pellman, D. M. Weinstock, Triplication of a 21q22 region contributes to  
980 B cell transformation through HMGN1 overexpression and loss of histone H3 Lys27  
981 trimethylation. *Nat Genet* **46**, 618-623 (2014); published online EpubJun  
982 (10.1038/ng.2949).
- 983 66. T. Deng, Y. Postnikov, S. Zhang, L. Garrett, L. Becker, I. Racz, S. M. Holter, W. Wurst,  
984 H. Fuchs, V. Gailus-Durner, M. H. de Angelis, M. Bustin, Interplay between H1 and  
985 HMGN epigenetically regulates OLIG1&2 expression and oligodendrocyte  
986 differentiation. *Nucleic Acids Res* **45**, 3031-3045 (2017); published online EpubApr 7  
987 (10.1093/nar/gkw1222).
- 988 67. T. Okano-Uchida, T. Himi, Y. Komiya, Y. Ishizaki, Cerebellar granule cell precursors  
989 can differentiate into astroglial cells. *Proc Natl Acad Sci U S A* **101**, 1211-1216 (2004);  
990 published online EpubFeb 3 (10.1073/pnas.0307972100).
- 991 68. J. Mao, P. Maye, P. Kogerman, F. J. Tejedor, R. Toftgard, W. Xie, G. Wu, D. Wu,  
992 Regulation of Gli1 transcriptional activity in the nucleus by Dyrk1. *J Biol Chem* **277**,  
993 35156-35161 (2002); published online EpubSep 20 (10.1074/jbc.M206743200).
- 994 69. H. Atas-Ozcan, V. Brault, A. Duchon, Y. Herault, Dyrk1a from Gene Function in  
995 Development and Physiology to Dosage Correction across Life Span in Down Syndrome.  
996 *Genes (Basel)* **12**, (2021); published online EpubNov 20 (10.3390/genes12111833).
- 997 70. M. L. Arbones, A. Thomazeau, A. Nakano-Kobayashi, M. Hagiwara, J. M. Delabar,  
998 DYRK1A and cognition: A lifelong relationship. *Pharmacol Ther* **194**, 199-221 (2019);  
999 published online EpubFeb (10.1016/j.pharmthera.2018.09.010).
- 1000 71. M. Stringer, C. R. Goodlett, R. J. Roper, Targeting trisomic treatments: optimizing  
1001 Dyrk1a inhibition to improve Down syndrome deficits. *Mol Genet Genomic Med* **5**, 451-  
1002 465 (2017); published online EpubSep (10.1002/mgg3.334).
- 1003 72. C. R. Goodlett, M. Stringer, J. LaCombe, R. Patel, J. M. Wallace, R. J. Roper, Evaluation  
1004 of the therapeutic potential of Epigallocatechin-3-gallate (EGCG) via oral gavage in  
1005 young adult Down syndrome mice. *Sci Rep* **10**, 10426 (2020); published online EpubJun  
1006 26 (10.1038/s41598-020-67133-z).
- 1007 73. M. Stringer, I. Abeysekera, J. Thomas, J. LaCombe, K. Stancombe, R. J. Stewart, K. J.  
1008 Dria, J. M. Wallace, C. R. Goodlett, R. J. Roper, Epigallocatechin-3-gallate (EGCG)  
1009 consumption in the Ts65Dn model of Down syndrome fails to improve behavioral  
1010 deficits and is detrimental to skeletal phenotypes. *Physiol Behav* **177**, 230-241 (2017);  
1011 published online EpubAug 1 (10.1016/j.physbeh.2017.05.003).
- 1012 74. R. Jamal, J. LaCombe, R. Patel, M. Blackwell, J. R. Thomas, K. Sloan, J. M. Wallace, R.  
1013 J. Roper, Increased dosage and treatment time of Epigallocatechin-3-gallate (EGCG)  
1014 negatively affects skeletal parameters in normal mice and Down syndrome mouse  
1015 models. *PLoS One* **17**, e0264254 (2022)10.1371/journal.pone.0264254).
- 1016 75. J. R. Thomas, K. Sloan, K. Cave, J. M. Wallace, R. J. Roper, Skeletal Deficits in Male  
1017 and Female down Syndrome Model Mice Arise Independent of Normalized Dyrk1a  
1018 Expression in Osteoblasts. *Genes (Basel)* **12**, (2021); published online EpubOct 28  
1019 (10.3390/genes12111729).
- 1020 76. B. L. McCurdy, C. E. Jewett, A. J. Stemm-Wolf, H. N. Duc, M. Joshi, J. M. Espinosa, R.  
1021 Prekeris, C. G. Pearson, Trisomy 21 increases microtubules and disrupts centriolar  
1022 satellite localization. *Mol Biol Cell*, mbcE21100517T (2022); published online EpubApr  
1023 27 (10.1091/mbc.E21-10-0517-T).

- 1024 77. A. J. M. Dingemans, K. M. G. Truijen, J. H. Kim, Z. Alacam, L. Faivre, K. M. Collins, E.  
1025 H. Gerkes, M. van Haelst, I. van de Laar, K. Lindstrom, M. Nizon, J. Pauling, E.  
1026 Heropolitanska-Pliszka, A. S. Plomp, C. Racine, R. Sachdev, M. Sinnema, J. Skranes, H.  
1027 E. Veenstra-Knol, E. A. Verberne, A. T. Vulto-van Silfhout, M. E. F. Wilsterman, E. E.  
1028 Ahn, B. B. A. de Vries, L. Vissers, Establishing the phenotypic spectrum of ZTTK  
1029 syndrome by analysis of 52 individuals with variants in SON. *Eur J Hum Genet* **30**, 271-  
1030 281 (2022); published online EpubMar (10.1038/s41431-021-00960-4).
- 1031 78. J. H. Kim, D. N. Shinde, M. R. F. Reijnders, N. S. Hauser, R. L. Belmonte, G. R. Wilson,  
1032 D. G. M. Bosch, P. A. Bubulya, V. Shashi, S. Petrovski, J. K. Stone, E. Y. Park, J. A.  
1033 Veltman, M. Sinnema, C. Stumpel, J. M. Draaisma, J. Nicolai, G. University of  
1034 Washington Center for Mendelian, H. G. Yntema, K. Lindstrom, B. B. A. de Vries, T.  
1035 Jewett, S. L. Santoro, J. Vogt, S. Deciphering Developmental Disorders, K. K. Bachman,  
1036 A. H. Seeley, A. Krokosky, C. Turner, L. Rohena, M. Hempel, F. Kortum, D. Lessel, A.  
1037 Neu, T. M. Strom, D. Wiczorek, N. Bramswig, F. A. Laccone, J. Behunova, H. Rehder,  
1038 C. T. Gordon, M. Rio, S. Romana, S. Tang, D. El-Khechen, M. T. Cho, K. McWalter, G.  
1039 Douglas, B. Baskin, A. Begtrup, T. Funari, K. Schoch, A. P. A. Stegmann, S. J. C.  
1040 Stevens, D. E. Zhang, D. Traver, X. Yao, D. G. MacArthur, H. G. Brunner, G. M.  
1041 Mancini, R. M. Myers, L. B. Owen, S. T. Lim, D. L. Stachura, L. Vissers, E. Y. E. Ahn,  
1042 De Novo Mutations in SON Disrupt RNA Splicing of Genes Essential for Brain  
1043 Development and Metabolism, Causing an Intellectual-Disability Syndrome. *Am J Hum*  
1044 *Genet* **99**, 711-719 (2016); published online EpubSep 1 (10.1016/j.ajhg.2016.06.029).
- 1045 79. M. T. Davisson, C. Schmidt, E. C. Akesson, Segmental trisomy of murine chromosome  
1046 16: a new model system for studying Down syndrome. *Prog Clin Biol Res* **360**, 263-280  
1047 (1990).
- 1048 80. C. S. Moore, C. Hawkins, A. Franca, A. Lawler, B. Devenney, I. Das, R. H. Reeves,  
1049 Increased male reproductive success in Ts65Dn "Down syndrome" mice. *Mamm Genome*  
1050 **21**, 543-549 (2010); published online EpubDec (10.1007/s00335-010-9300-8).
- 1051 81. R. H. Reeves, N. G. Irving, T. H. Moran, A. Wohn, C. Kitt, S. S. Sisodia, C. Schmidt, R.  
1052 T. Bronson, M. T. Davisson, A mouse model for Down syndrome exhibits learning and  
1053 behaviour deficits. *Nat Genet* **11**, 177-184 (1995); published online EpubOct  
1054 (10.1038/ng1095-177).
- 1055 82. G. Lu, R. E. Middleton, H. Sun, M. Naniong, C. J. Ott, C. S. Mitsiades, K. K. Wong, J. E.  
1056 Bradner, W. G. Kaelin, Jr., The myeloma drug lenalidomide promotes the cereblon-  
1057 dependent destruction of Ikaros proteins. *Science* **343**, 305-309 (2014); published online  
1058 EpubJan 17 (10.1126/science.1244917).
- 1059 83. E. Kim, N. Ilic, Y. Shrestha, L. Zou, A. Kamburov, C. Zhu, X. Yang, R. Lubonja, N.  
1060 Tran, C. Nguyen, M. S. Lawrence, F. Piccioni, M. Bagul, J. G. Doench, C. R. Chouinard,  
1061 X. Wu, L. Hogstrom, T. Natoli, P. Tamayo, H. Horn, S. M. Corsello, K. Lage, D. E.  
1062 Root, A. Subramanian, T. R. Golub, G. Getz, J. S. Boehm, W. C. Hahn, Systematic  
1063 Functional Interrogation of Rare Cancer Variants Identifies Oncogenic Alleles. *Cancer*  
1064 *Discov* **6**, 714-726 (2016); published online EpubJul (10.1158/2159-8290.CD-16-0160).
- 1065 84. H. Zeng, J. Jia, A. Liu, Coordinated translocation of mammalian Gli proteins and  
1066 suppressor of fused to the primary cilium. *PLoS One* **5**, e15900 (2010); published online  
1067 EpubDec 29 (10.1371/journal.pone.0015900).

- 1068 85. A. Dobin, C. A. Davis, F. Schlesinger, J. Drenkow, C. Zaleski, S. Jha, P. Batut, M.  
1069 Chaisson, T. R. Gingeras, STAR: ultrafast universal RNA-seq aligner. *Bioinformatics* **29**,  
1070 15-21 (2013); published online EpubJan 1 (10.1093/bioinformatics/bts635).
- 1071 86. L. Song, S. Sabunciyan, G. Yang, L. Florea, A multi-sample approach increases the  
1072 accuracy of transcript assembly. *Nat Commun* **10**, 5000 (2019); published online  
1073 EpubNov 1 (10.1038/s41467-019-12990-0).
- 1074 87. S. Anders, W. Huber, Differential expression analysis for sequence count data. *Genome*  
1075 *Biol* **11**, R106 (2010)10.1186/gb-2010-11-10-r106).
- 1076 88. L. Kolberg, U. Raudvere, I. Kuzmin, J. Vilo, H. Peterson, gprofiler2 -- an R package for  
1077 gene list functional enrichment analysis and namespace conversion toolset g:Profiler.  
1078 *F1000Res* **9**, (2020)10.12688/f1000research.24956.2).
- 1079 89. S. Hanzelmann, R. Castelo, J. Guinney, GSEA: gene set variation analysis for microarray  
1080 and RNA-seq data. *BMC Bioinformatics* **14**, 7 (2013); published online EpubJan 16  
1081 (10.1186/1471-2105-14-7).
- 1082 90. T. Wu, E. Hu, S. Xu, M. Chen, P. Guo, Z. Dai, T. Feng, L. Zhou, W. Tang, L. Zhan, X.  
1083 Fu, S. Liu, X. Bo, G. Yu, clusterProfiler 4.0: A universal enrichment tool for interpreting  
1084 omics data. *Innovation (N Y)* **2**, 100141 (2021); published online EpubAug 28  
1085 (10.1016/j.xinn.2021.100141).
- 1086 91. H. Wickham, M. Averick, J. Bryan, W. Chang, L. McGowan, R. François, G.  
1087 Golemund, A. Hayes, L. Henry, J. Hester, M. Kuhn, T. Pedersen, E. Miller, S. Bache, K.  
1088 Müller, J. Ooms, D. Robinson, D. Seidel, V. Spinu, H. Yutani, Welcome to the  
1089 Tidyverse. **4**, 1686 (2019).
- 1090 92. S. Xu, M. Chen, T. Feng, L. Zhan, L. Zhou, G. Yu, Use ggbreak to Effectively Utilize  
1091 Plotting Space to Deal With Large Datasets and Outliers. *Front Genet* **12**, 774846  
1092 (2021)10.3389/fgene.2021.774846).
- 1093 93. A. S. F. Berry, C. Farias Amorim, C. L. Berry, C. M. Syrett, E. D. English, D. P. Beiting,  
1094 An Open-Source Toolkit To Expand Bioinformatics Training in Infectious Diseases.  
1095 *mBio* **12**, e0121421 (2021); published online EpubAug 31 (10.1128/mBio.01214-21).
- 1096 94. H. Y. Lee, L. A. Greene, C. A. Mason, M. C. Manzini, Isolation and culture of post-natal  
1097 mouse cerebellar granule neuron progenitor cells and neurons. *J Vis Exp*, (2009);  
1098 published online EpubJan 16 (10.3791/990).

1099 **Acknowledgments:**

1100 We would like to thank William Kaelin, Eric Campeau, Jesse Boehm, William Hahn, David  
1101 Root, Aimin Liu, and Didier Trono for sharing plasmids and the Johns Hopkins Single Cell &  
1102 Transcriptomics Core for providing sequencing services.

1103 **Funding:**

1104 National Institutes of Health grant 5R01HD038384 (RHR)

1105 National Institutes of Health grant U54HD079123 (RHR)

1106 National Institutes of Health grant 5R21HD082614 (RHR)

1107 Johns Hopkins Institute for Basic Biomedical Sciences Core Coin grant (RHR)

1108 National Institutes of Health grant F31HD098826 (AJM)

1109 National Institutes of Health grant T32GM007814 (AJM)

1110 The content is solely the responsibility of the authors and does not necessarily represent the

1111 official views of the National Institutes of Health.

1112 **Author contributions:**

1113 Conceptualization: RHR, FXF, AJM

1114 Formal analysis: AJM, LDF, YL, RHR

1115 Funding acquisition: RHR, AJM

1116 Investigation: AJM, FXF, YL, DKK

1117 Project administration: RHR, AJM

1118 Resources: DKK, AJM, YK, MO

1119 Software: LDF

1120 Supervision: RHR

1121 Visualization: AJM, FXF

1122 Writing – original draft: AJM

1123 Writing – review & editing: RHR

1124 **Competing interests:** MO is a CEO, employee, and shareholder of Trans Chromosomics, Inc.

1125 Other authors declare no competing interests.

1126 **Data and materials availability:** Plasmids are available from Addgene

1127 ([https://www.addgene.org/Roger\\_Reeves/](https://www.addgene.org/Roger_Reeves/)). Raw sequence data are deposited in the Gene

1128 Expression Omnibus, GEO accession number GSE202938. TcMAC21 mice are available from

1129 The Jackson Laboratory and require an agreement with RIKEN BRC and The National

1130 University Corporation Tottori University before shipping.

1131



1132 **Supplementary Figures**

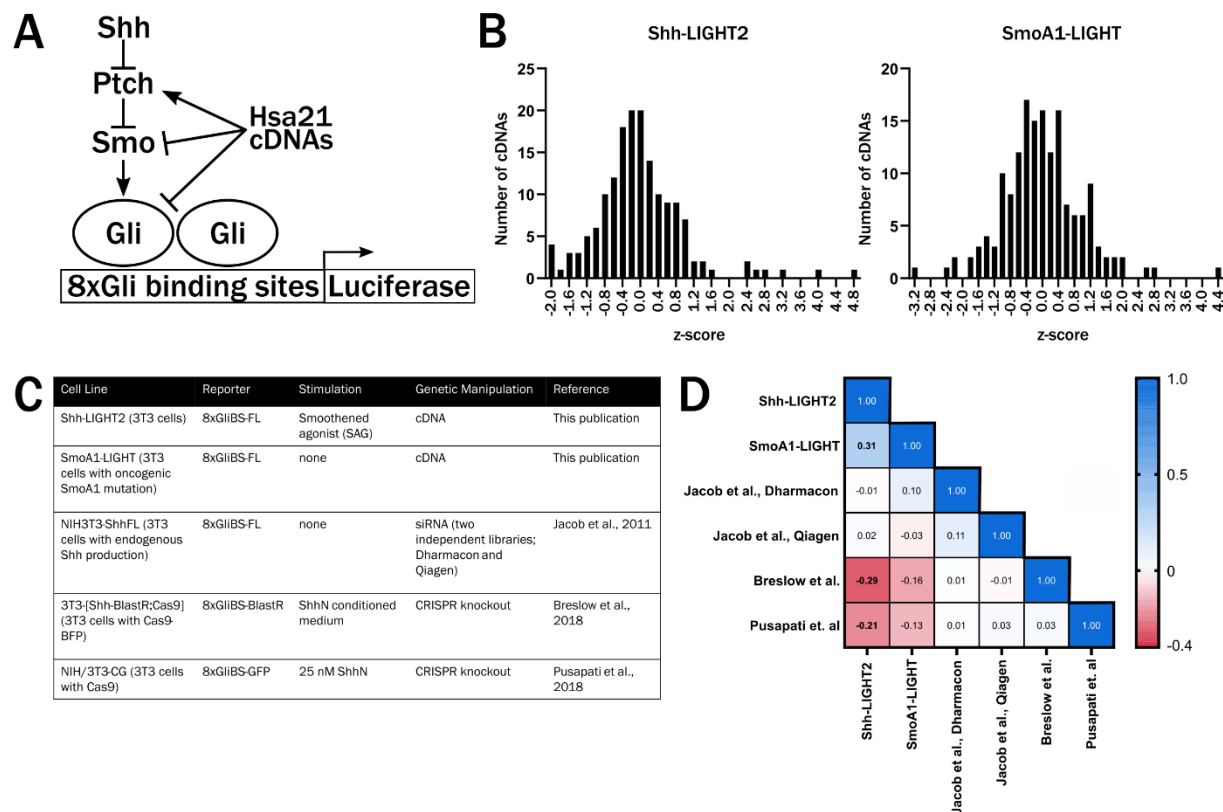

1133

1134 **Fig.S1. Shh-LIGHT2 and SmoA1-LIGHT screens.** (A) Schematic of SHH signaling and

1135 8xGliBS-FL reporter. Sonic hedgehog binds to Patched and relieves inhibition of Smoothed,

1136 which acts as a transducer to activate signaling via the Gli transcription factors. Binding of Gli to

1137 the 8xGliBS-FL promotes transcription of luciferase. Overexpression of chromosome 21 genes

1138 may activate or inhibit SHH signaling at any level of the signaling pathway. (B) Distribution of

1139 z-scores in Shh-LIGHT2 and SmoA1-LIGHT cDNA overexpression screens. (C) Summary of

1140 previously reported siRNA knockdown and CRISPR knockout screens using the 8xGliBS

1141 reporter. (D) Correlation matrix showing Pearson correlation coefficient  $r$  between pairs of

1142 screens for the 115 chromosome 21 genes and mouse orthologs with data across all screens.

1143 Bolded correlation coefficients have  $P < 0.05$ . The Shh-LIGHT2 and SmoA1-LIGHT cDNA

1144 screens are positively correlated, whereas Shh-LIGHT2 shows a negative correlation with two

1145 CRISPR knockout screens.

1146

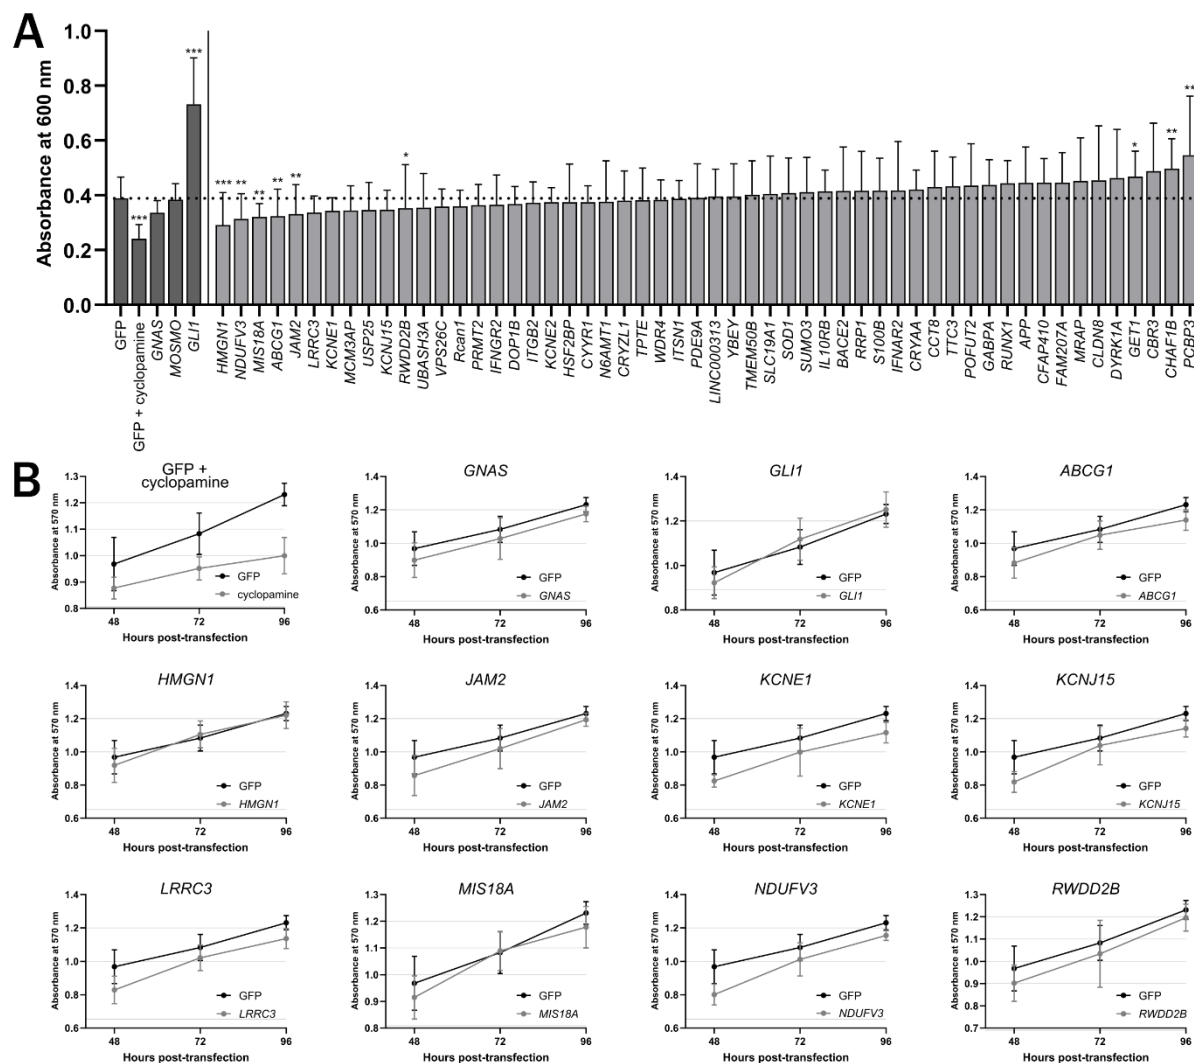

1147

1148

1149 **Fig.S2. C3H10T1/2 osteoblast differentiation and viability following transfection of**

1150 **chromosome 21 cDNAs. (A)** Quantification of alkaline phosphatase activity following

1151 transfection of chromosome 21 cDNAs and stimulation with SAG (n=20). All conditions were

1152 compared to GFP control. \*\*\*P<0.001, \*\*P<0.01, \*P<0.05 (Kruskal-Wallis test followed by

1153 Dunn's post-hoc test). **(B)** Quantification of viability of untreated C3H10T1/2 cells 48, 72, and

1154 96 hours post-transfection (n=7). In cells treated with SAG, only cyclophosphamide treatment affected

1155 viability (data not shown).

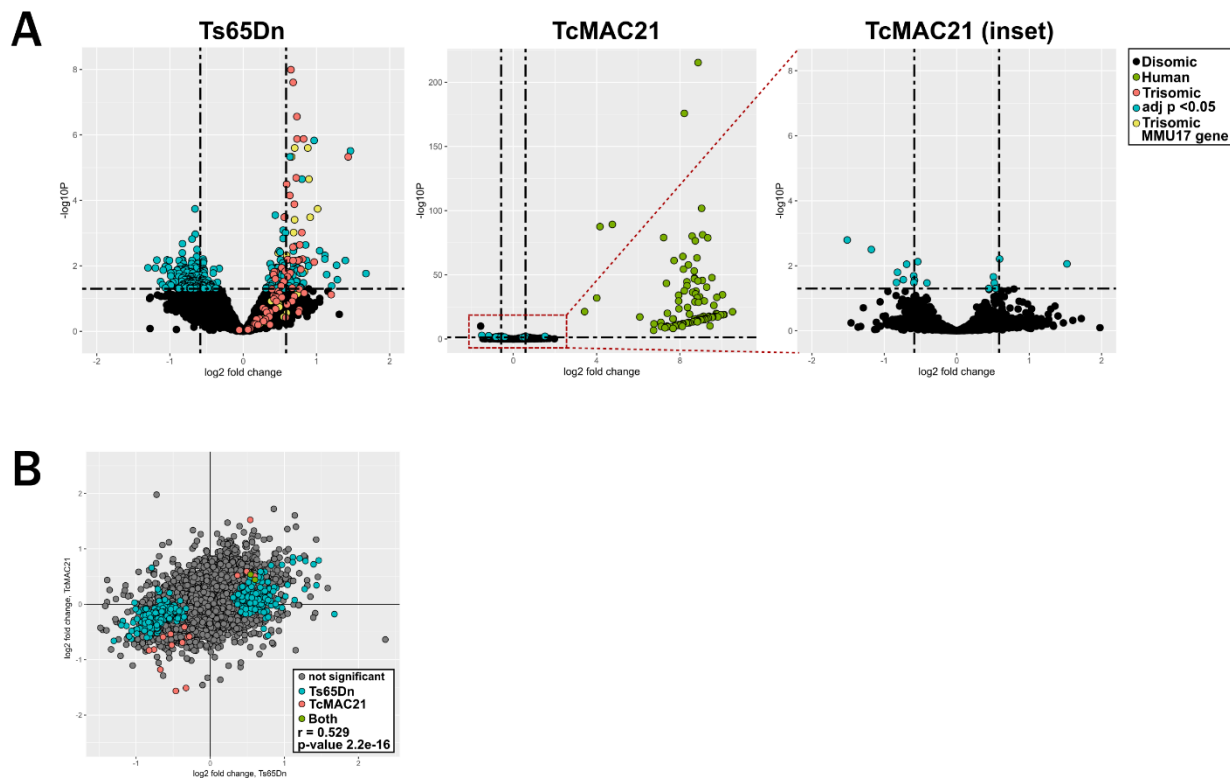

1156

1157 **Fig.S3. Expression of disomic genes in Ts65Dn and TcMAC21 cerebellum. (A)** Volcano  
1158 plots showing  $\log_2$  fold change and  $-\log_{10}(P)$  value in Ts65Dn and TcMAC21 samples. Teal  
1159 points represent disomic transcripts with adjusted  $P < 0.05$ , salmon points represent chromosome  
1160 21 orthologs that are trisomic in Ts65Dn, yellow points represent non-chromosome 21 orthologs  
1161 (MMU17) transcripts that are trisomic in Ts65Dn, and green points represent human transcripts  
1162 in TcMAC21 samples. **(B)** Scatterplot showing  $\log_2$  fold change of disomic transcripts in  
1163 Ts65Dn and TcMAC21 samples. Teal points are significantly differentially expressed in Ts65Dn  
1164 samples, salmon points are significantly differentially expressed in TcMAC21 samples, and  
1165 green points are differentially expressed in both Ts65Dn and TcMAC21 samples. Pearson  
1166 correlation coefficient  $r=0.529$  and  $P=2.2e-16$ .

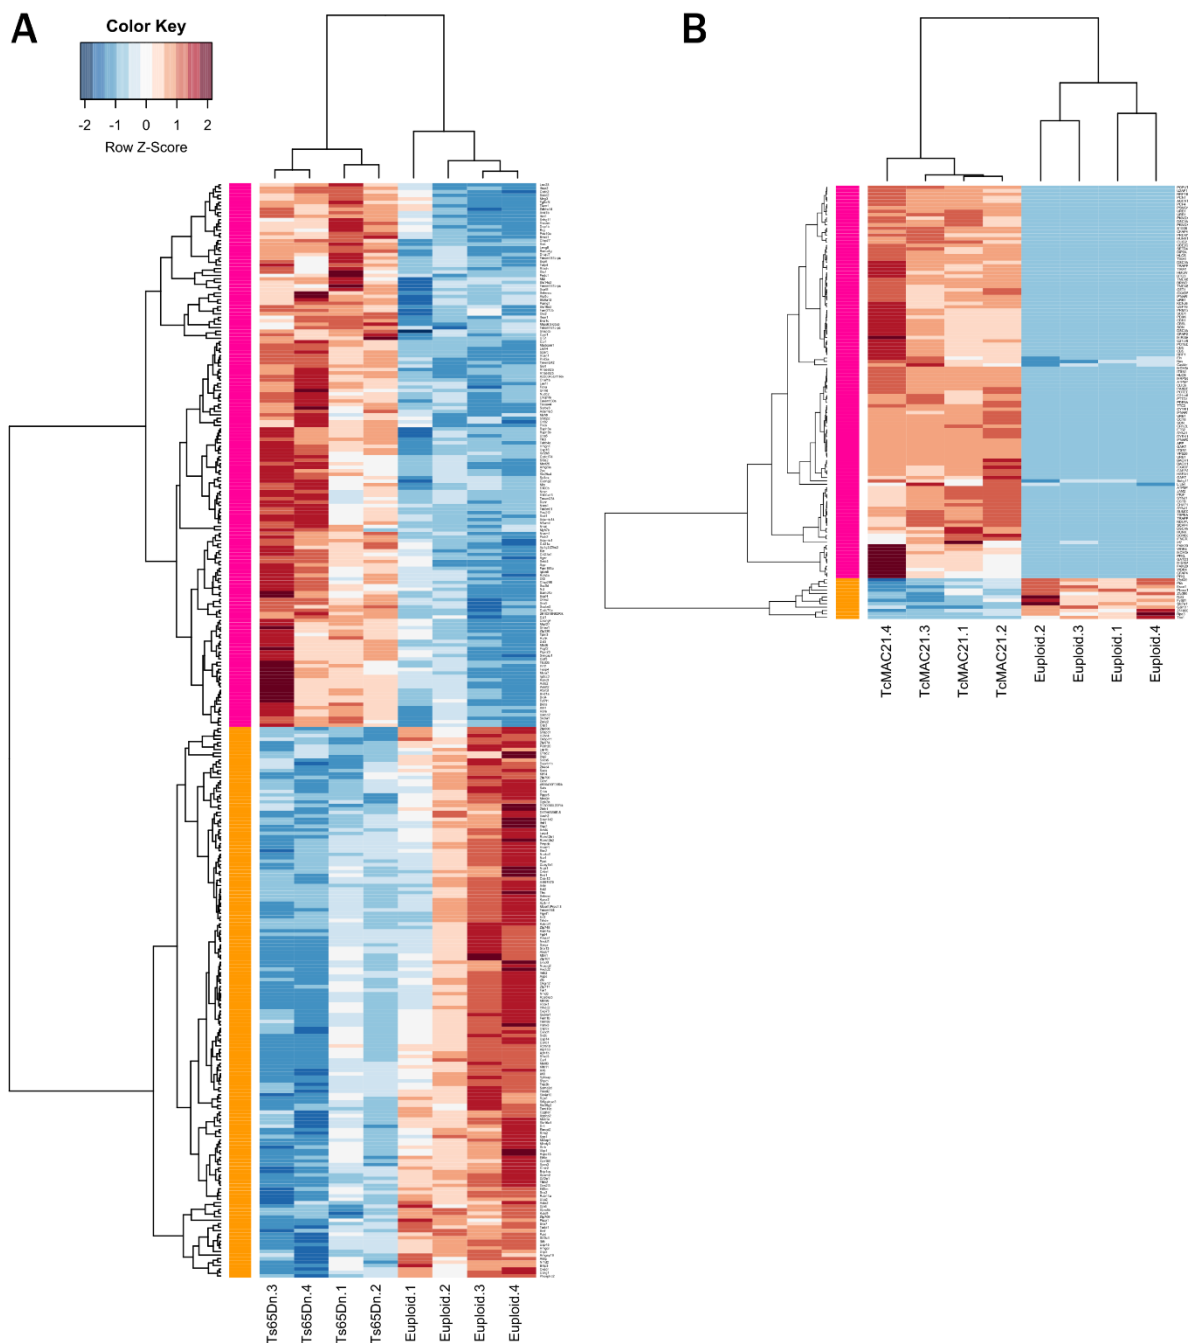

1167

1168 **Fig.S4. Unsupervised clustering of differentially expressed genes in Ts65D and TcMAC21**

1169 **samples. (A)** Unsupervised clustering of 314 differentially expressed transcripts (rows) in 4

1170 Ts65Dn cerebella and 4 euploid littermates (columns). The orange module represents genes

1171 downregulated in Ts65Dn relative to control and the pink module represents genes upregulated

1172 in Ts65Dn. **(B)** Unsupervised clustering of 127 differentially expressed transcripts in 4  
1173 TcMAC21 cerebella and 4 euploid littermates. 109/127 differentially expressed transcripts derive  
1174 from the HSA21q-MAC hybrid chromosome.  
1175

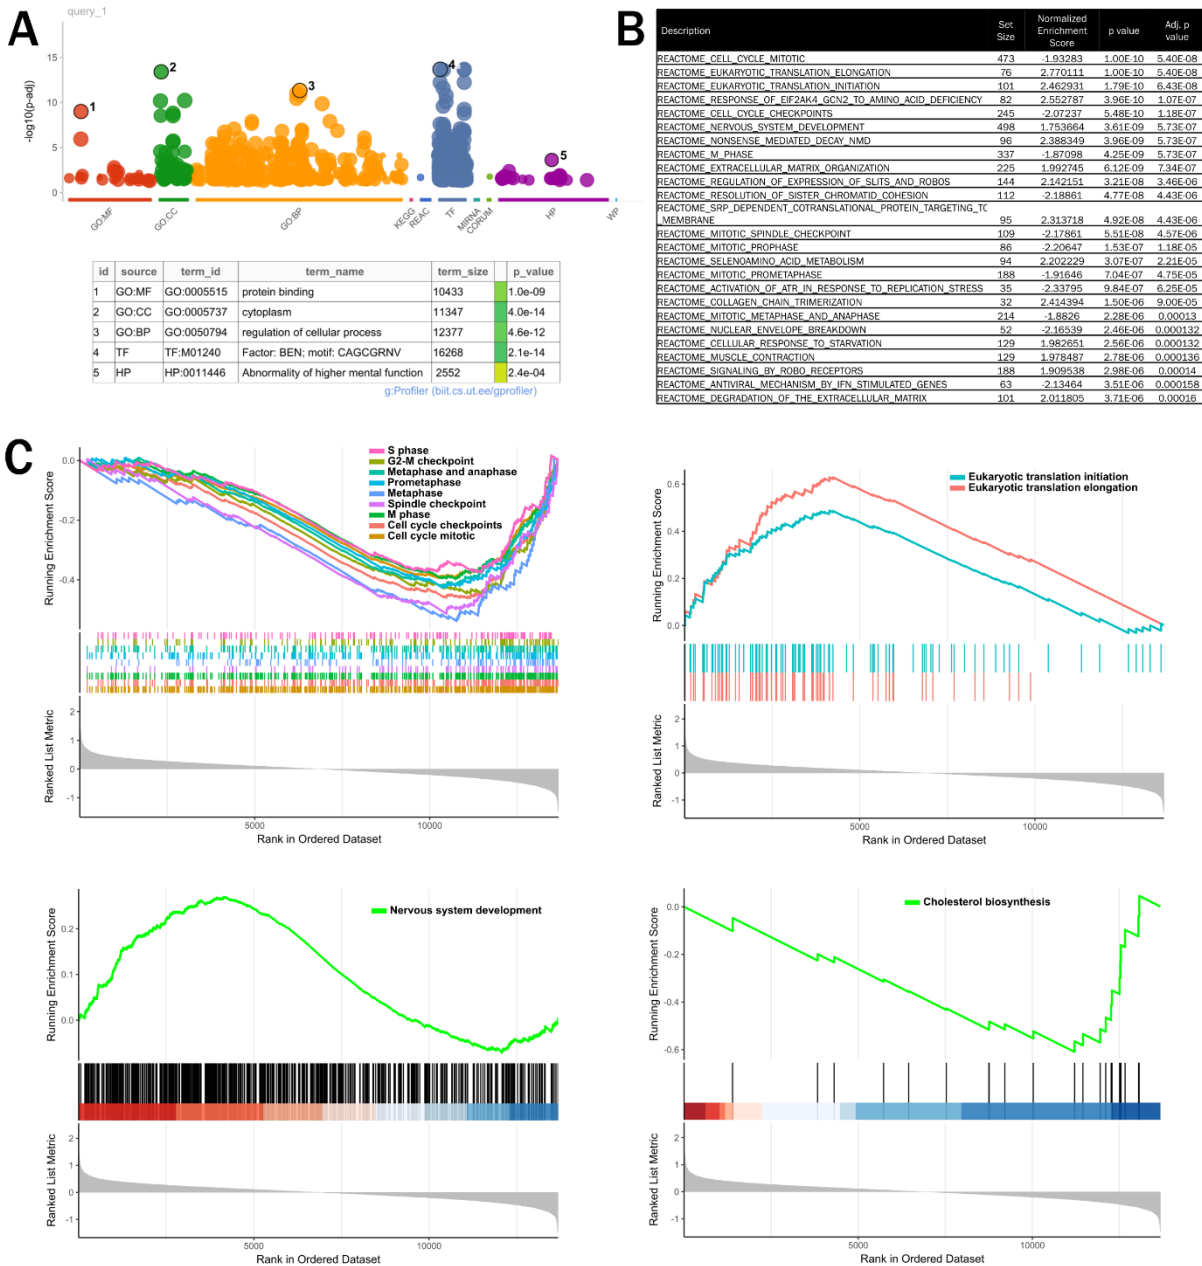

1176

1177 **Fig.S5. Gene ontology and gene set enrichment analyses of differentially expressed genes in**

1178 **Ts65Dn cerebellum. (A) Manhattan plot showing top gene ontology terms identified in Ts65Dn**

1179 **cerebellum. Differentially expressed genes contributing to “abnormality of higher mental**

1180 **function” are listed in figure S6. (B) Top 25 pathways identified by gene set enrichment analysis**

1181 **in Ts65Dn samples. (C) Gene set enrichment analysis for pathways significantly enriched in**

1182 Ts65Dn samples (translation and nervous system development) and pathways enriched in control  
1183 samples (mitotic/cell cycle and cholesterol biosynthesis).  
1184



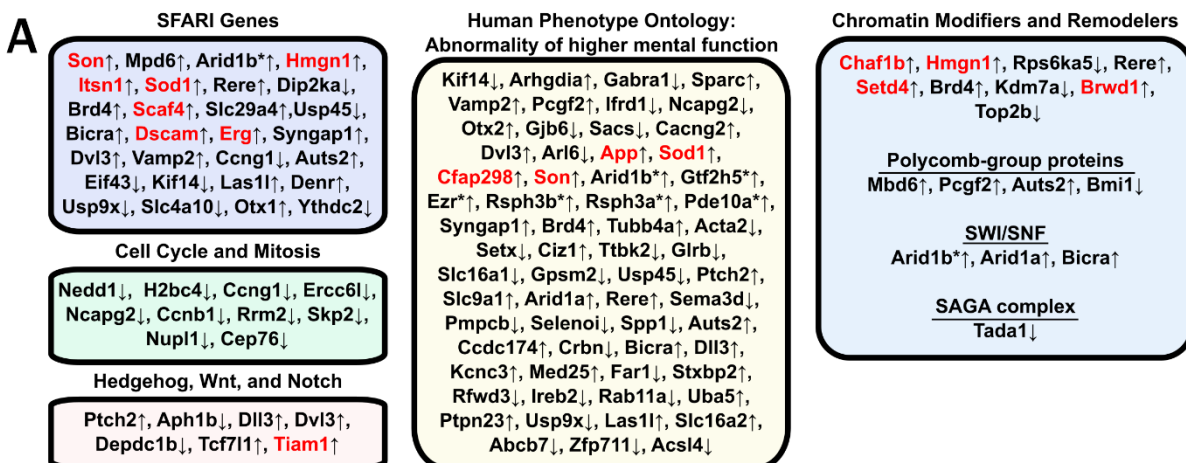

1185

1186 **Fig.S6. Differentially expressed genes in Ts65Dn cerebellum are implicated in human**

1187 **neurodevelopmental disorders, mitosis, and chromatin remodeling. (A)** Subset of

1188 differentially expressed genes ( $q < 0.05$ ) identified in Ts65Dn grouped by cellular and disease

1189 processes. Up arrows signify genes that are upregulated in Ts65Dn samples, asterisks signify

1190 genes that are trisomic in Ts65Dn mice but are not orthologs of chromosome 21 genes, and red

1191 signifies trisomic genes that are orthologs of chromosome 21 genes. Differentially expressed

1192 genes include 28 in the SFARI Gene database of autism susceptibility loci and others related to

1193 cell cycle/mitosis, key developmental pathways including SHH, and chromatin modifiers and

1194 remodelers.

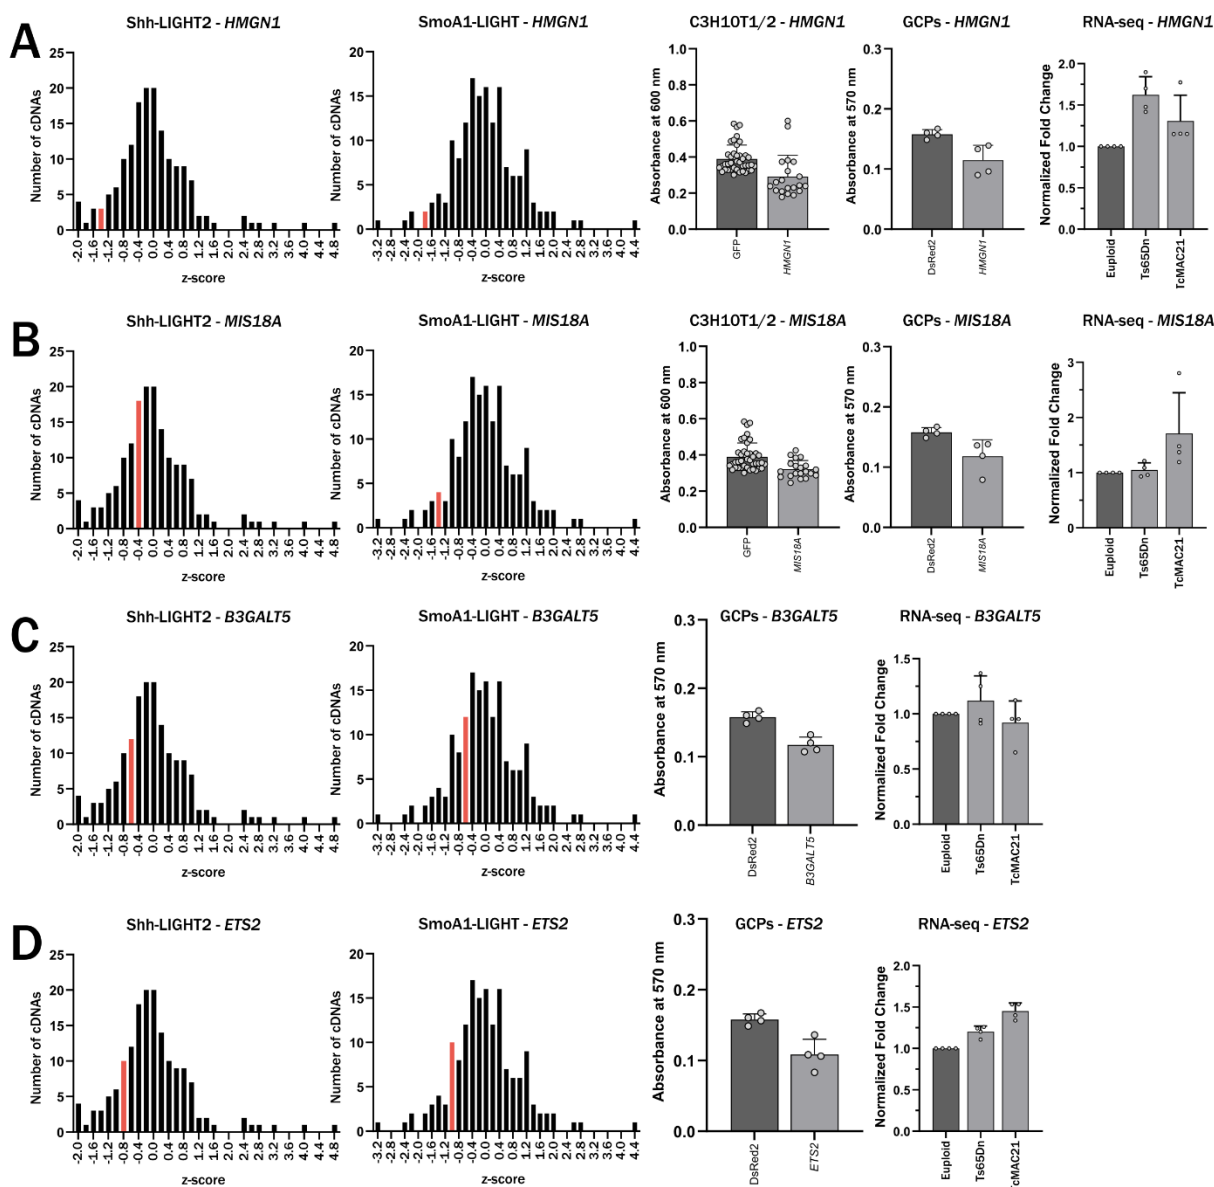

1195

1196 **Fig.S7. Summary of effects of *HMGN1*, *MIS18A*, *B3GALT5*, and *ETS2* on SHH pathway**

1197 **activation. (A) Effect of *HMGN1* overexpression on luciferase activity in Shh-LIGHT2 and**

1198 **SmoA1-LIGHT cells, osteoblast differentiation in C3H10T1/2 cells, and proliferation in primary**

1199 **granule cell precursors. Bin containing *HMGN1* for Shh-LIGHT2 and SmoA1-LIGHT assays is**

1200 **highlighted in red. Overexpression of *HMGN1* or its mouse ortholog in Ts65Dn and TcMAC21**

1201 cerebellum graphed relative to euploid controls (n=4). Same for **(B)** *MIS18A*, **(C)** *B3GALT5*, and

1202 **(D)** *ETS2*.

1203
